# 1 Cell-specific Bioorthogonal Tagging of Glycoproteins in 2 Co-culture

3 Anna Cioce<sup>a,b</sup>, Beatriz Calle<sup>a,b</sup>, Andrea Marchesi<sup>a,b</sup>, Ganka Bineva-Todd<sup>b</sup>, Helen Flynn<sup>c</sup>, Zhen Li<sup>a,b</sup>,  
4 Omur Y. Tastan<sup>b</sup>, Chloe Rouston<sup>d</sup>, Tessa Keenan<sup>e</sup>, Peter Both<sup>f</sup>, Kun Huang<sup>f</sup>, Fabio Parmeggiani<sup>f</sup>,  
5 Ambrosius P. Snijders<sup>c</sup>, Svend Kjaer<sup>d</sup>, Martin A. Fascione<sup>e</sup>, Sabine Flitsch<sup>f</sup>, Benjamin Schumann<sup>a,b,\*</sup>

6 <sup>a</sup>Department of Chemistry, Imperial College London, 80 Wood Lane, W12 0BZ, London, United  
7 Kingdom.

8 <sup>b</sup>The Chemical Glycobiology Laboratory, The Francis Crick Institute, 1 Midland Rd, NW1 1AT  
9 London, United Kingdom.

10 <sup>c</sup>Proteomics Science Technology Platform, The Francis Crick Institute, NW1 1AT London, United  
11 Kingdom.

12 <sup>d</sup>Structural Biology Science Technology Platform, The Francis Crick Institute, NW1 1AT London,  
13 United Kingdom.

14 <sup>e</sup>Department of Chemistry, University of York, YO10 5DD York, United Kingdom.

15 <sup>f</sup>Manchester Institute of Biotechnology & School of Chemistry, The University of Manchester, M1  
16 7DN Manchester, United Kingdom.

17 \*Correspondence should be addressed to: [b.schumann@imperial.ac.uk](mailto:b.schumann@imperial.ac.uk).

18

## 19 SUMMARY

20 This work describes the development of a strategy to profile the glycoproteome with bioorthogonal tags in a  
21 cell-specific manner. We use a synthetic biology strategy in which an artificial biosynthetic AND gate leads to  
22 the cell-specific biosynthesis of a tagged UDP-sugar that, in turn, is used by the cellular glycosylation  
23 machinery. Comprehensive characterisation in mono- and co-culture experiments reveal a strong foundation for  
24 cell-specific glycoproteome analysis.

## 25 ABSTRACT

26 Interactions between cells fundamentally impact biological processes. In cancer development, such interactions  
27 define key stages of disease that cannot be adequately recapitulated in cell monoculture. Complex co-culture  
28 studies have been key to unraveling the complexity of these processes, usually by sorting cells and  
29 transcriptome or bulk proteome analyses. However, these methods invariably lead to sample loss and do not  
30 capture aberrant glycosylation as an important corollary of cancer formation. Here, we report the development  
31 of Bio-Orthogonal Cell line-specific Tagging of Glycoproteins (BOCTAG). Cells are equipped with a  
32 biosynthetic AND gate that uses bioorthogonally tagged sugars to generate glycosylation precursors. The  
33 cellular glycosylation machinery then introduces bioorthogonal tags into glycoproteins exclusively in cell lines  
34 expressing the enzymes of the biosynthetic AND gate. Modification with clickable reporter moieties allows for

35 imaging or enrichment with mass spectrometry-proteomics in a cell-specific fashion. Making use of glycans as a  
36 property of most cell surface proteins, we use BOCTAG as an efficient means for cell-specific protein tracing.

## 37 INTRODUCTION

38 Interactions between cells fundamentally shape physiological processes. In cancer, these interactions are  
39 aberrant, with tumour cells impacting non-cancerous bystander cells and vice versa. The complexity of such  
40 interplay is difficult to emulate in cell monoculture, requiring more elaborated co-culture systems.<sup>1-3</sup> Recent  
41 years have seen a massive increase in methods to probe the transcriptomes of different interacting cell  
42 populations, providing some insight into their state within a multicellular conglomerate.<sup>4</sup> However, the  
43 relationship between transcriptome and proteome is still less clear.<sup>5</sup> In addition, posttranslational modifications  
44 (PTMs) heavily impact the plasticity of the proteome. Glycosylation is the most complex and most abundant  
45 PTM, but difficult to probe due to the non-templated nature of glycan biosynthesis.<sup>6</sup> Glycans are generated by  
46 the combinatorial interplay of >250 glycosyltransferases (GTs) and glycosidases, mostly in the secretory  
47 pathway.<sup>7</sup> Certain cancer-derived glycoproteins are approved as diagnostic markers, but their discovery in  
48 complex model systems is a particular challenge.<sup>8,9</sup> This is especially true when *in vivo* or *in vitro* model  
49 systems comprise cell populations from the same organism that do not allow bioinformatic distinction of  
50 proteomes.<sup>10,11</sup> Methods to study the glycoproteome of a cell type in co-culture experiments are therefore a  
51 largely unmet need.

52 Metabolic oligosaccharide engineering (MOE) has revolutionized the field of glycoproteomics.<sup>12</sup> MOE reagents  
53 are membrane permeable monosaccharide precursors modified with chemical reactive tags amenable for  
54 bioorthogonal chemistry.<sup>13</sup> Many MOE reagents are based on chemically tagged analogues of *N*-  
55 acetylgalactosamine (GalNAc) that are activated by the biosynthetic GalNAc salvage pathway to derivatives of  
56 the nucleotide-sugar UDP-GalNAc.<sup>14-17</sup> Epimerisation at C4 position by the epimerase GALE yields UDP-*N*-  
57 acetylglucosamine (UDP-GlcNAc) analogues that can be used by different glycosyltransferases to chemically  
58 tag glycan structures in the secretory pathway and in the cytosol.<sup>16-18</sup> In turn, UDP-GalNAc analogues are used  
59 by members of the cancer-relevant *N*-acetylgalactosaminyltransferase (GalNAc-T) family consisting of 20  
60 members (T1...T20).<sup>14,19,20</sup> We have recently used engineered double mutants (DM) of GalNAc-Ts to enable  
61 recognition of bulky analogues of UDP-GalNAc that are not used by WT-GalNAc-Ts.<sup>21-23</sup> Following  
62 incorporation, chemical tags are traced with enrichment handles or fluorophores by methods of bioorthogonal  
63 chemistry, including Cu(I)-catalysed azide-alkyne cycloaddition (CuAAC).<sup>24</sup> Despite recent advances in the  
64 development of new MOE reagents, no chemical probes are yet available for the cell-specific tagging of  
65 glycoproteins.

66 Here, we developed Bio-Orthogonal Cell-specific Tagging of Glycoproteins (BOCTAG) as an MOE strategy  
67 that allows for cell-specific investigation of the (glyco-)proteome in co-culture model systems. The strategy uses  
68 a biosynthetic AND-gate to generate an alkyne-tagged UDP-GalNAc analogue from a stable, readily available  
69 precursor. Only in cells carrying the pathway, wild-type GTs and engineered GalNAc-Ts use the nucleotide-  
70 sugar to chemically tag the glycoproteome. We demonstrate that BOCTAG allows for programmable  
71 glycoprotein tagging in living cells and in co-culture models from a simple, readily available precursor. We  
72 show that the chemical modification enters a range of glycan types, supporting the promiscuity of BOCTAG to

73 tag a large number of glycoproteins. The expression of engineered GalNAc-Ts preferentially accommodating  
74 the nucleotide-sugar further enhances labeling, rendering BOCTAG a promising tool for cell-specific  
75 glycoproteomics.

## 76 RESULTS

### 77 **Metabolic engineering of a biosynthetic AND gate for a chemically tagged UDP-sugar**

78 Design of a metabolic AND gate requires a linear 2-step biosynthetic pathway with the ability to supply the  
79 precursor and monitor conversions of both steps. We chose the GalNAc salvage pathway that consists of the  
80 kinase GALK2 and the pyrophosphorylase AGX1 to convert GalNAc first into GalNAc-1-phosphate and  
81 subsequently into UDP-GalNAc, respectively (Fig. 1A). The GalNAc salvage pathway is impervious to large  
82 modifications of the *N*-acyl group of GalNAc, e.g. a 6-carbon hex-5-ynoate chain in the substrate herein called  
83 GalN6yne (Fig. 1A).<sup>21,25,26</sup> In contrast, a shorter 5-carbon pent-4-ynoate chain in the substrate GalNAIk can be  
84 used as a substrate in low efficiency.<sup>17</sup> This is corroborated by the crystal structures of both GALK2 and AGX1  
85 (Fig. S1). We thus designed BOCTAG to contain an artificial salvage pathway for GalN6yne which was  
86 hypothesized to not be used by the native GalNAc salvage pathway. We reasoned that interconversion by GALE  
87 to the C4 epimer, UDP-GlcN6yne, would affect chemical glycoprotein labelling in the living cell (Fig. 1A). We  
88 and others have mutated AGX1 at residue Phe383 to smaller amino acids to accommodate chemical  
89 modifications at the *N*-acyl position of sugar-1-phosphate substrates.<sup>21,27</sup> AGX1<sup>F383A</sup>, herein called mut-AGX1,  
90 converted synthetic GalN6yne-1-phosphate to UDP-GalN6yne in an *in vitro* liquid chromatography-mass  
91 spectrometry (LC-MS) assay, while WT-AGX1 did not accept GalN6yne-1-phosphate at both 2 h and 16 h  
92 reaction times (Fig. 1B, Fig. S2A). In contrast to AGX1, the human kinase GALK2 was deemed unsuitable for  
93 engineering because the amino acids in close proximity to the *N*-acyl group are part of a hydrogen bond network  
94 that appear to stabilise positioning of the Mg<sup>2+</sup> ion in the active site (Fig. S1). We instead turned to bypassing  
95 the GALK2 step with a more promiscuous kinase. Bacterial *N*-acetylhexosaminyl kinases (NahK) are widely  
96 used to phosphorylate GalNAc derivatives in chemoenzymatic syntheses.<sup>28</sup> Recombinant NahK from various  
97 species converted GalN6yne to GalN6yne-1-phosphate almost quantitatively in an *in vitro* assay, in contrast to  
98 GALK2 and the human galactose-specific kinase GALK1 (Fig. 1B). We chose to incorporate the most widely-  
99 used NahK from *Bifidobacterium longum* as a codon-optimised version for human expression in our BOCTAG  
100 strategy. Stable bicistronic expression of both *B. longum* NahK and mut-AGX1 in K-562 cells biosynthesized  
101 UDP-GalN6yne from a membrane-permeable per-acetylated precursor Ac<sub>4</sub>GalN6yne (Fig. 1C). Expression of  
102 either enzyme alone or WT-AGX1 led to inefficient biosynthesis at best compared to levels of native UDP-  
103 sugars (Fig. S3). We further confirmed that by-passing of both enzymatic steps is needed for UDP-GalN6yne  
104 biosynthesis by feeding cells a protected precursor of GalN6yne-1-phosphate. Following non-specific uncaging  
105 in the living cell, UDP-GalN6yne was biosynthesised only in cells expressing mut-AGX1. Equally, a GalNAc  
106 analogue with a shorter side chain, GalNAIk, was efficiently converted to UDP-GalNAIk by cells only  
107 expressing mut-AGX1. In all cases, alkyne-tagged UDP-GalNAc analogues were interconverted to the  
108 corresponding UDP-GlcNAc analogues by GALE, which was corroborated for UDP-GalN6yne in an *in vitro*  
109 epimerization assay (Fig. 1C, fig. S2C, fig. S3). Thus, installing a biosynthetic AND gate for salvaging  
110 GalN6yne led to the biosynthesis of both UDP-GalN6yne and UDP-GlcN6yne, enabling chemical tagging of a  
111 wide range of different glycan subtypes by BOCTAG.

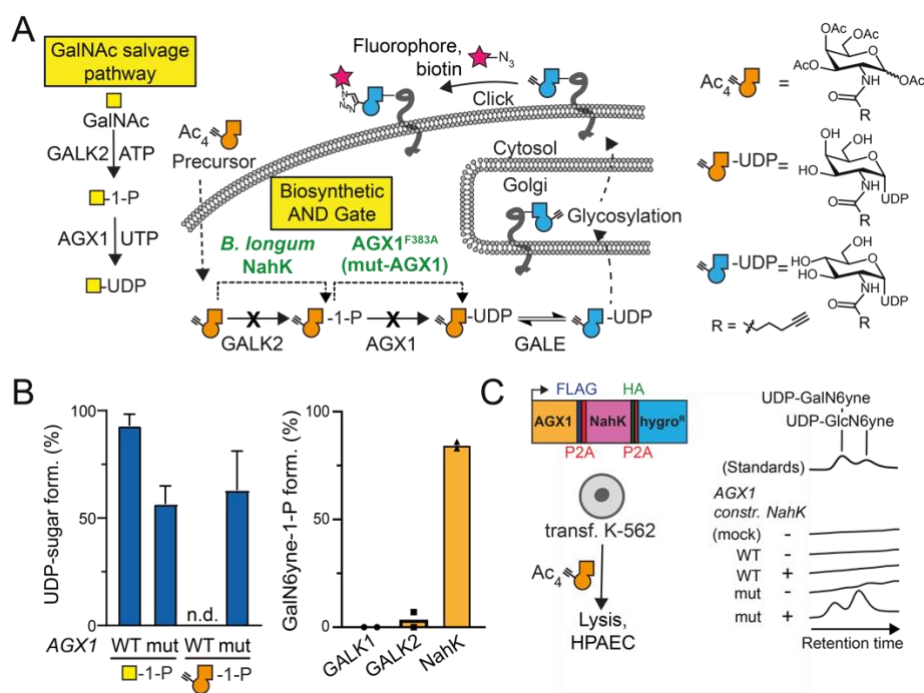

112

113 **Fig. 1: Development of a metabolic AND gate for biosynthesis of UDP-GalN6yne 1.** A, strategy of  
 114 BOCTAG. The native GalNAc salvage pathway accepts GalNAc to synthesise UDP-GalNAc, but does not  
 115 accept a GalNAc analogue with an *N*-hexynoyl side chain. *B. longum* NahK and mut-AGX1 biosynthesise  
 116 UDP-GalN6yne and, by epimerization, UDP-GlcN6yne. Incorporation into GlcNAc-containing glycoconjugates  
 117 can be traced by CuAAC. *B.* *in vitro* evaluation of UDP-GalN6yne biosynthesis by WT- or mut-AGX1 (left)  
 118 and evaluation of GalN6yne-1-phosphate biosynthesis by human GALK1, GALK2 and *B. longum* NahK (right).  
 119 Data are from LC-MS assays and integrated ion counts. Data are from three independent experiments and  
 120 depicted as means ± SD (left) or two independent experiments and depicted as individual data points and means  
 121 (right). C, biosynthesis of UDP-GalN6yne and UDP-GlcN6yne in cells stably expressing both NahK and mut-  
 122 AGX1, as assessed by high performance anion exchange chromatography (HPAEC). Data are one  
 123 representative out of two independent experiments.

124 To prove the validity of the MOE approach based on Ac<sub>4</sub>GalN6yne, we confirmed chemical tagging of the cell  
 125 surface glycoproteome. Alkyne tags were readily visualized by in-gel fluorescence in glycoproteomes of cells  
 126 stably transfected with NahK and mut-AGX1 that were fed with Ac<sub>4</sub>GalN6yne and treated with the clickable  
 127 fluorophore CF-680 by CuAAC (Fig. 2A). Cells only expressing either NahK or mut-AGX1 exhibited no or  
 128 sixfold reduced fluorescent labelling intensity, respectively. The promiscuous MOE reagent Ac<sub>4</sub>ManAlk that  
 129 enters the sialic acid pool gave fluorescent labelling regardless of the enzyme combination expressed.  
 130 Fluorescent labelling was selective for NahK and mut-AGX1 expression over three orders of magnitude,  
 131 underlining the robustness of programmable glycoprotein tagging (Fig. 2B).

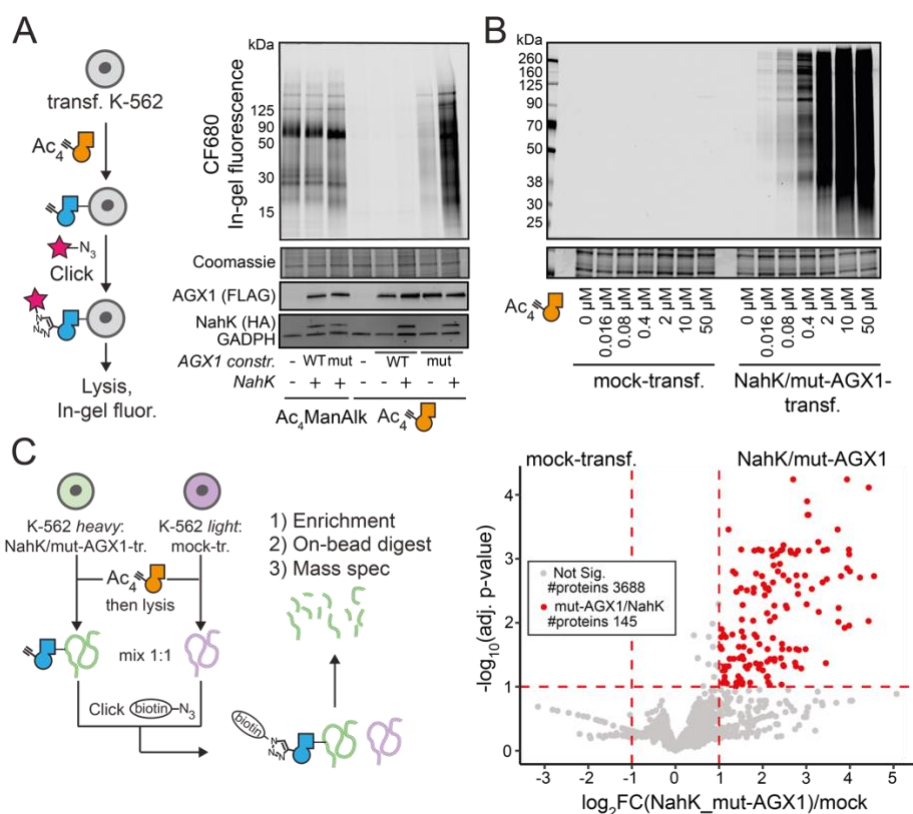

132

133 **Fig. 2: A metabolic AND gate enables programmable chemical tagging of the glycoproteome.** *A*, evaluation  
 134 of cell surface glycoproteome tagging after treating K-562 cells transfected with NahK/AGX1 combinations 50  
 135  $\mu\text{M}$   $\text{Ac}_4\text{GalN}_6\text{yne}$  or 10  $\mu\text{M}$   $\text{Ac}_4\text{ManNAIk}$ . *B*, dose-response experiment of cell surface tagging. Data in *A* and  
 136 *B* are from one representative out of two independent experiments each. *C*, quantitative measurement of  
 137 glycoprotein labelling by SILAC. Data were analysed from three independent experiments with forward (heavy  
 138 mock, light NahK/mut-AGX1) and reverse analyses incorporated, as a total of six replicates.

139 **A metabolic AND gate allows for programmable enrichment of the proteome.**

140 We used Stable Isotope Labeling by Amino Acids in Cell Culture (SILAC) to quantify chemical tagging.  
 141 BOCTAG- or mock-transfected K-562 cells were individually grown in heavy or light media in the presence of  
 142  $\text{Ac}_4\text{GalN}_6\text{yne}$ . Lysates of these cells were mixed to contain equal amounts of heavy and light protein, and  
 143 clickable biotin-picolyl azide was installed by CuAAC. Enrichment on neutravidin beads allowed to exclusively  
 144 isolate biotin-tagged proteins that, after double digestion with LysC and trypsin, were analyzed by quantitative  
 145 MS. Statistical analyses contained three independent experiments in which both combinations of heavy and light  
 146 SILAC labelling each were used to give a total of six replicates (Fig. 2C). We found peptides from 145 proteins  
 147 to be significantly enriched in BOCTAG-transfected cells. NahK/mut-AGX1-transfected cells fed with DMSO  
 148 as a vehicle control gave similar labelling to mock-transfected cells fed with  $\text{Ac}_4\text{GalN}_6\text{yne}$ . More than 99% of  
 149 the proteins selectively enriched from NahK/mut-AGX1-transfected cells have been previously annotated as  
 150 either Asn(N)- or Ser/Thr(O)-glycosylated, including the nucleoporins Nup62 and Nup153 and the cell surface  
 151 glycoproteins CD47 and NOTCH1, confirming the stringency of the approach for glycoproteins.

152

153 **Assessing and manipulating glycan promiscuity of GalN6yne**

154 We next sought to address the glycan targets of our MOE approach. We were prompted by our recent findings  
 155 that GalNAc analogues with bulky *N*-acyl chains such as GalN6yne are exclusively incorporated into mucin-  
 156 type O-GalNAc glycans by DM-GalNAc-Ts (Fig. 3A).<sup>21-23</sup> We stably co-expressed WT- or DM-versions of  
 157 GalNAc-T1 or T2 with NahK and mut-AGX1 from the same plasmid through a bidirectional promoter in K-562  
 158 cells. Expression of DM-GalNAc-Ts increased the intensity of in-gel fluorescence by more than sevenfold over  
 159 expression of WT-GalNAc-Ts (Fig. 3B). WT-AGX1 expressing cells lacked UDP-GalN6yne/GlcN6yne  
 160 biosynthesis and did not show any discernible fluorescent labelling over vehicle control DMSO. We assessed  
 161 the glycan targets of chemical tagging by digestion with the hydrolytic enzymes PNGase F (reduces N-  
 162 glycosylation), StcE (digests mucin-type glycoproteins) and OperATOR (digests O-GalNAc glycoproteins in  
 163 the presence of the sialidase SialEXO) prior to in-gel fluorescence.<sup>29</sup> In cells expressing NahK, mut-AGX1 and  
 164 WT-GalNAc-Ts, fluorescent labelling was slightly sensitive to PNGase F treatment, indicating that the major  
 165 target structures of BOCTAG alone are N-glycoproteins (Fig. 3C). Co-expression of DM-GalNAc-Ts with  
 166 NahK/mut-AGX1 led to additional fluorescent labelling of a small number of presumably mucin-type O-  
 167 glycoproteins with high intensity and sensitivity to both StcE and OperATOR/SialEXO (Fig. 3C). Thus, DM-  
 168 GalNAc-Ts broaden the target scope of BOCTAG to include mucin-type O-glycoproteins with high  
 169 incorporation efficiency. Concomitant with this finding, we performed quantitative MS-proteome analysis by  
 170 SILAC of cell lines expressing BOCTAG+DM-T2. In contrast to cells expressing only BOCTAG, we observed  
 171 an increase of 37% to 61% of enriched annotated O-GalNAc glycoproteins (Table S1, table S2).

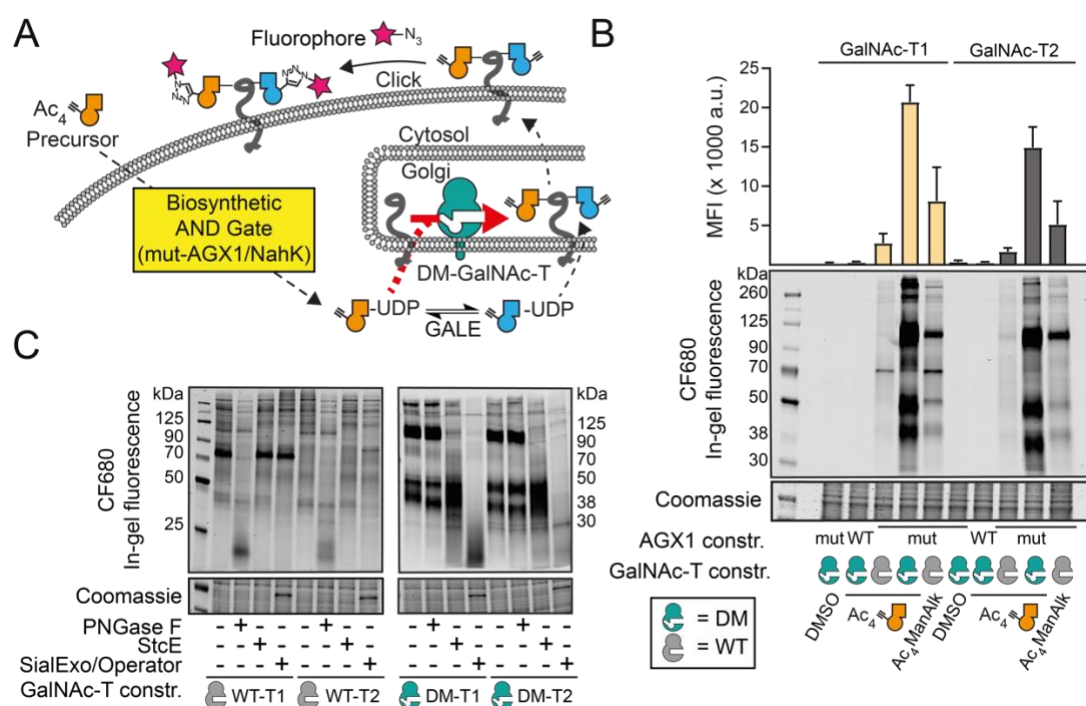

172  
 173 **Fig. 3: Enhancement of programmable glycoprotein tagging by expression of DM-GalNAc-Ts.** A, strategy  
 174 of labelling O-GalNAc glycans in addition to GlcNAc-containing glycans. Expression of DM-GalNAc-Ts  
 175 selectively engineered to accommodate bulky chemical tags mediates preferential O-GalNAc tagging in cells  
 176 expressing NahK/mut-AGX1. B, evaluation of labelling efficiency by feeding transfected K-562 cells with

177 DMSO, 1  $\mu$ M Ac<sub>4</sub>GalN6yne or 2  $\mu$ M Ac<sub>4</sub>ManNAIk, analysis of labelling by in-gel fluorescence and  
 178 quantification as means  $\pm$  SD from three independent experiments. All cell lines used here expressed NahK. C,  
 179 assessment of labeled glycans by treatment with hydrolytic enzymes of the samples analysed in B. Data are from  
 180 one representative out of a total of four replicate labelling experiments performed on two different days.

### 181 Cell type-specific glycoproteome tagging in co-culture

182 We assessed the suitability of the synthetic salvage pathway as a metabolic AND gate as a BOCTAG cell type-  
 183 specific (glyco)proteome labelling technique by fluorescence microscopy. Colonies of NahK/mut-AGX1-  
 184 transfected, GFP-expressing 4T1 breast cancer cells were established on a monolayer of non-transfected MLg  
 185 fibroblast cells by co-culturing for 72 h before media supplementation with Ac<sub>4</sub>GalN6yne (Fig. 4A). Clickable  
 186 biotin-picolyl azide was installed by CuAAC followed by Streptavidin-AF647 staining to visualize chemical  
 187 tagging and counter-stained with phalloidin. Streptavidin-AF647 signal was strongly and reproducibly restricted  
 188 to GFP-expressing cells only when Ac<sub>4</sub>GalN6yne was fed (Fig. 4B, C), indicating a localised BOCTAG signal.  
 189 In contrast, the promiscuous MOE reagent Ac<sub>4</sub>ManNAIk was non-specifically incorporated throughout the  
 190 entire co-culture (Fig. 4B, C). Taken together, BOCTAG enables cell-specific tagging of cell surface  
 191 glycoproteins in co-culture.

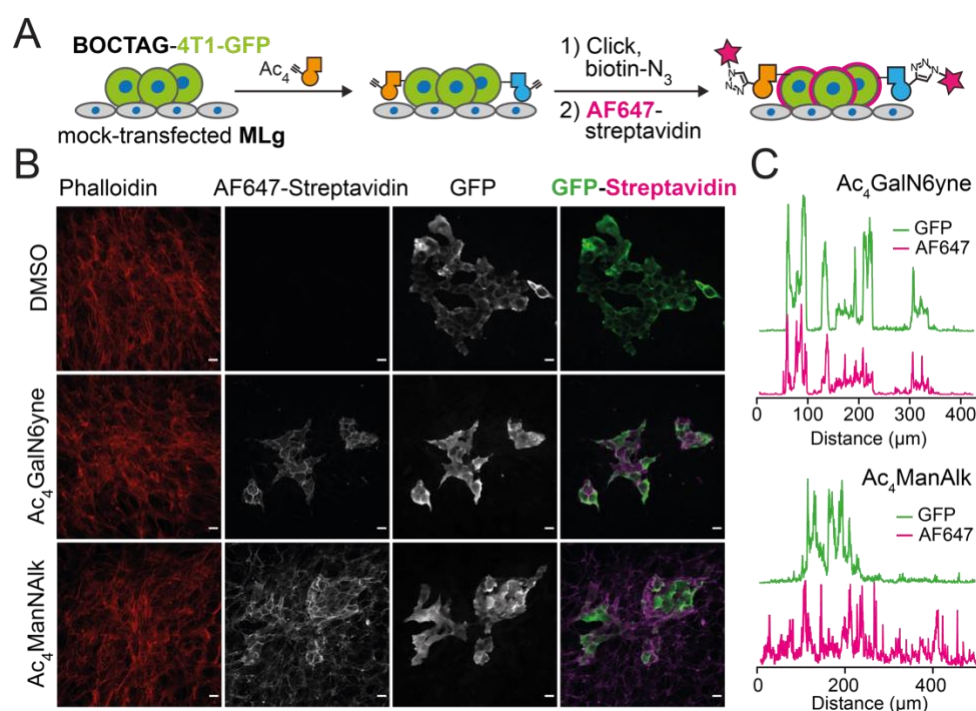

192  
 193 **Fig. 4: Bioorthogonal cell-specific glycoprotein tagging in co-culture.** A, schematic of the 4T1-MLg co-  
 194 culture experiment. GFP-tagged 4T1 cells transfected with NahK/mut-AGX1 should be selectively positive for  
 195 AF647-labelling in BOCTAG. B, fluorescence microscopy, using co-cultures fed with 50  $\mu$ M Ac<sub>4</sub>GalN6yne or  
 196 50  $\mu$ M Ac<sub>4</sub>ManNAIk as well as phalloidin as a counterstain. C, intensity profile of fluorescent signal between  
 197 GFP and AF647 in Ac<sub>4</sub>GalN6yne- (top) or Ac<sub>4</sub>ManNAIk-fed (bottom) co-cultures.

198

199

200 DISCUSSION

201 Our incentives to develop BOCTAG were twofold. First, there is still an unmet need for chemical  
202 tagging of proteins produced by a particular cell type. While glycans are a means to an end in this  
203 respect, the large signal-to-noise ratio in our fluorescent labelling experiments paired with the absence  
204 of toxicity in MOE indicates that our BOCTAG is complementary to other techniques, including the  
205 use of unnatural amino acids and proximity biotinylation.<sup>30,31</sup> Second, directly incorporating glycans  
206 in the analysis will give insight into cell-type-specific glycosylation sites and glycan structures to add  
207 another dimension to cell-type-specific glycoproteome profiling. A metabolic AND gate was  
208 necessary to ensure minimal background labelling while being able to supply the tagged  
209 monosaccharide as an easy-to-synthesise MOE reagent, which is in marked difference to highly  
210 unstable caged sugar-1-phosphates used previously.<sup>19,21</sup> To enable BOCTAG, cells require  
211 transfection with at least two transgenes. However, the design of a bicistronic, transposase-responsive  
212 plasmid ensures that transfection efforts are straightforward. BOCTAG will be used to profile the  
213 cell-specific glycoproteome in complex co-culture model systems.

214

215 ACKNOWLEDGEMENTS

216 We thank Carolyn R. Bertozzi for helpful discussions, Mahmoud-Reza Rafiee for help with data  
217 analysis, Acely Garza-Garcia, Holly Douglas and Christelle Soudy for help with chromatography, and  
218 Kayvon Pedram for providing StcE. We thank Junwon Choi for UDP-sugar standards for  
219 chromatography. We thank Phil Walker for advice on vector choice, and Rocco D'Antuono of the  
220 Crick Advanced Light Microscopy STP for support and assistance in this work. We are grateful for  
221 support by the Francis Crick Institute Cell Services Science Technology Platform. This work was  
222 supported by the Francis Crick Institute (A. C., B. C., G. B-T., Z. L. O. Y. T., B. S.) which receives its  
223 core funding from Cancer Research UK Grant FC001749, UK Medical Research Council Grant  
224 FC001749, and Wellcome Trust Grant FC001749. This work was supported by the ERC (788231 to  
225 S. L. F.), the Wellcome Trust (218304/Z/19/Z to A. M. and B. S.), the EPSRC (EP/S013741/1 to T.  
226 K. and M. A. F., and EP/S005226/1 to S. L. F.), and the BBSRC (BB/T01279X/1 to Z. L. and B. S.,  
227 BB/M027791/1 and BB/M028836/1 to S. L. F., and BB/M02847X/1 to T. K. and M. A. F.). B.C. was  
228 supported by a Crick-HEI studentship funded by the Department of Chemistry at Imperial College



229 London and the Francis Crick Institute. For the purpose of Open Access, the author has applied a CC  
230 BY public copyright licence to any Author Accepted Manuscript version arising from this submission.

## 231 REFERENCES

- 232 1. Ombrato, L. *et al.* Metastatic-niche labelling reveals parenchymal cells with stem features.  
233 *Nature* **572**, 603–608 (2019).
- 234 2. del Pozo Martin, Y. *et al.* Mesenchymal Cancer Cell-Stroma Crosstalk Promotes Niche  
235 Activation, Epithelial Reversion, and Metastatic Colonization. *Cell Rep.* **13**, 2456–2469  
236 (2015).
- 237 3. Yamaguchi, H. & Sakai, R. Direct interaction between carcinoma cells and cancer associated  
238 fibroblasts for the regulation of cancer invasion. *Cancers (Basel)*. **7**, 2054–2062 (2015).
- 239 4. Nayak, R. & Hasija, Y. A hitchhiker’s guide to single-cell transcriptomics and data analysis  
240 pipelines. *Genomics* **113**, 606–619 (2021).
- 241 5. Schoof, E. M. *et al.* Quantitative single-cell proteomics as a tool to characterize cellular  
242 hierarchies. *Nat. Commun.* **12**, (2021).
- 243 6. Varki, A. Biological roles of glycans. *Glycobiology* **27**, 3–49 (2017).
- 244 7. Schjoldager, K. T., Narimatsu, Y., Joshi, H. J. & Clausen, H. Global view of human protein  
245 glycosylation pathways and functions. *Nat. Rev. Mol. Cell Biol.* **21**, 729–749 (2020).
- 246 8. Kailemia, M. J., Park, D. & Lebrilla, C. B. Glycans and glycoproteins as specific biomarkers  
247 for cancer. *Anal. Bioanal. Chem.* **409**, 395–410 (2017).
- 248 9. Scott, E. & Munkley, J. Glycans as biomarkers in prostate cancer. *Int. J. Mol. Sci.* **20**, (2019).
- 249 10. Krasny, L. & Huang, P. H. Data-independent acquisition mass spectrometry (DIA-MS) for  
250 proteomic applications in oncology. doi:10.1039/d0mo00072h.
- 251 11. Gauthier, N. P. *et al.* Cell-selective labeling using amino acid precursors for proteomic studies  
252 of multicellular environments. *Nat. Methods* **10**, 768–773 (2013).
- 253 12. Sletten, E. M. & Bertozzi, C. R. Bioorthogonal chemistry: Fishing for selectivity in a sea of  
254 functionality. *Angew. Chem. Int. Ed.* **48**, 6974–6998 (2009).
- 255 13. Parker, C. G. & Pratt, M. R. Click Chemistry in Proteomic Investigations. *Cell* vol. 180 605–  
256 632 (2020).
- 257 14. Hang, H. C., Yu, C., Kato, D. L. & Bertozzi, C. R. A metabolic labeling approach toward  
258 proteomic analysis of mucin-type O-linked glycosylation. *Proc. Natl. Acad. Sci. U. S. A.* **100**,

- 259 14846–14851 (2003).
- 260 15. Zaro, B. W., Yang, Y. Y., Hang, H. C. & Pratt, M. R. Chemical reporters for fluorescent  
261 detection and identification of O-GlcNAc-modified proteins reveal glycosylation of the  
262 ubiquitin ligase NEDD4-1. *Proc. Natl. Acad. Sci. U. S. A.* **108**, 8146–8151 (2011).
- 263 16. Boyce, M. *et al.* Metabolic cross-talk allows labeling of O-linked  $\beta$ -N- acetylglucosamine-  
264 modified proteins via the N-acetylgalactosamine salvage pathway. *Proc. Natl. Acad. Sci. U. S.*  
265 *A.* **108**, 3141–3146 (2011).
- 266 17. Cioce, A. *et al.* Optimization of Metabolic Oligosaccharide Engineering with Ac 4 GalNAk  
267 and Ac 4 GlcNAk by an Engineered Pyrophosphorylase. doi:10.1021/acscchembio.1c00034.
- 268 18. Broussard, A. *et al.* Human UDP-galactose 4'-epimerase (GALE) is required for cell-surface  
269 glycome structure and function. *J. Biol. Chem.* **295**, 1225–1239 (2020).
- 270 19. Debets, M. F. *et al.* Metabolic precision labeling enables selective probing of O-linked N -  
271 acetylgalactosamine glycosylation . *Proc. Natl. Acad. Sci. U. S. A.* **117**, 25293–25301 (2020).
- 272 20. Pratt, M. R. *et al.* Deconvoluting the functions of polypeptide N- $\alpha$ -  
273 acetylgalactosaminyltransferase family members by glycopeptide substrate profiling. *Chem.*  
274 *Biol.* **11**, 1009–1016 (2004).
- 275 21. Schumann, B. *et al.* Bump-and-Hole Engineering Identifies Specific Substrates of  
276 Glycosyltransferases in Living Cells. *Mol. Cell* **78**, 824-834.e15 (2020).
- 277 22. Choi, J. *et al.* Engineering Orthogonal Polypeptide GalNAc-Transferase and UDP-Sugar Pairs.  
278 *J. Am. Chem. Soc.* **141**, 13442–13453 (2019).
- 279 23. Cioce, A., Malaker, S. A. & Schumann, B. Generating orthogonal glycosyltransferase and  
280 nucleotide sugar pairs as next-generation glycobiology tools. *Current Opinion in Chemical*  
281 *Biology* vol. 60 66–78 (2021).
- 282 24. Besanceney-Webler, C. *et al.* Increasing the efficacy of bioorthogonal click reactions for  
283 bioconjugation: A comparative study. *Angew. Chem. Int. Ed.* **50**, 8051–8056 (2011).
- 284 25. Pouilly, S., Bourgeaux, V., Piller, F. & Piller, V. Evaluation of analogues of GalNAc as  
285 substrates for enzymes of the Mammalian GalNAc salvage pathway. *ACS Chem. Biol.* **7**, 753–  
286 760 (2012).
- 287 26. Bourgeaux, V., Piller, F. & Piller, V. Two-step enzymatic synthesis of UDP-N-  
288 acetylgalactosamine. *Bioorganic Med. Chem. Lett.* **15**, 5459–5462 (2005).
- 289 27. Yu, S. H. *et al.* Metabolic labeling enables selective photocrosslinking of O-GlcNAc-modified

- 290 proteins to their binding partners. *Proc. Natl. Acad. Sci. U. S. A.* **109**, 4834–4839 (2012).
- 291 28. Keenan, T. *et al.* Profiling Substrate Promiscuity of Wild-Type Sugar Kinases for Multi-  
292 fluorinated Monosaccharides. *Cell Chem. Biol.* **27**, 1199-1206.e5 (2020).
- 293 29. Malaker, S. A. *et al.* The mucin-selective protease StcE enables molecular and functional  
294 analysis of human cancer-associated mucins. *Proc. Natl. Acad. Sci. U. S. A.* **116**, 7278–7287  
295 (2019).
- 296 30. Wei, W. *et al.* Cell type-selective secretome profiling in vivo. *Nat. Chem. Biol.* **17**, 326–334  
297 (2021).
- 298 31. Alvarez-Castelao, B. *et al.* Cell-type-specific metabolic labeling of nascent proteomes in vivo.  
299 *Nat. Biotechnol.* **35**, 1196–1201 (2017).
- 300
