# 1 Cell-specific Bioorthogonal Tagging of Glycoproteins

2 Anna Cioce<sup>a,b</sup>, Beatriz Calle<sup>a,b</sup>, Tatiana Rizou<sup>c,§</sup>, Sarah C. Lowery<sup>d,§</sup>, Victoria Bridgeman<sup>e,§</sup>, Keira E.  
3 Mahoney<sup>d,§</sup>, Andrea Marchesi<sup>a,b</sup>, Ganka Bineva-Todd<sup>b</sup>, Helen Flynn<sup>e</sup>, Zhen Li<sup>a,b</sup>, Omur Y. Tastan<sup>b</sup>,  
4 Chloe Roustan<sup>f</sup>, Pablo Soro-Barrio<sup>g</sup>, Thomas M. Wood<sup>h,k</sup>, Tessa Keenan<sup>i</sup>, Peter Both<sup>j</sup>, Kun Huang<sup>j,l</sup>,  
5 Fabio Parmeggiani<sup>j,m</sup>, Ambrosius P. Snijders<sup>e</sup>, Mark Skehel<sup>e</sup>, Svend Kjaer<sup>f</sup>, Martin A. Fascione<sup>i</sup>,  
6 Carolyn R. Bertozzi<sup>h</sup>, Sabine Flitsch<sup>j</sup>, Stacy A. Malaker<sup>d</sup>, Ilaria Malanchi<sup>c</sup>, Benjamin Schumann<sup>a,b,\*</sup>

7 <sup>a</sup>Department of Chemistry, Imperial College London, 80 Wood Lane, W12 0BZ, London, United  
8 Kingdom.

9 <sup>b</sup>Chemical Glycobiology Laboratory, The Francis Crick Institute, 1 Midland Rd, NW1 1AT London,  
10 United Kingdom.

11 <sup>c</sup>Tumour-Host Interaction Laboratory, The Francis Crick Institute, 1 Midland Rd, NW1 1AT London,  
12 United Kingdom.

13 <sup>d</sup>Department of Chemistry, Yale University, 275 Prospect Street, New Haven, CT 06511, United States.

14 <sup>e</sup>Proteomics Science Technology Platform, The Francis Crick Institute, NW1 1AT London, United  
15 Kingdom.

16 <sup>f</sup>Structural Biology Science Technology Platform, The Francis Crick Institute, NW1 1AT London,  
17 United Kingdom.

18 <sup>g</sup>Bioinformatics & Biostatistics Science Technology Platform, The Francis Crick Institute, NW1 1AT  
19 London, United Kingdom.

20 <sup>h</sup>Department of Chemistry, Stanford University, Stanford, CA 94305, USA.

21 <sup>i</sup>Department of Chemistry, University of York, YO10 5DD York, United Kingdom.

22 <sup>j</sup>Manchester School of Chemistry & Institute of Biotechnology, The University of Manchester, M1  
23 7DN Manchester, United Kingdom.

24 <sup>k,l</sup>current address: Massachusetts Institute of Technology, Cambridge, USA

25 <sup>l</sup>current address: Department of Chemistry and Biochemistry, University of Maryland, Baltimore, MD  
26 21250, USA.

27 <sup>m</sup>current address: Department of Chemistry, Materials and Chemical Engineering “G. Natta”,  
28 Politecnico di Milano, 20131 Milano, Italy

29 <sup>§</sup>These authors contributed equally.

30 <sup>\*</sup>Correspondence should be addressed to: [b.schumann@imperial.ac.uk](mailto:b.schumann@imperial.ac.uk).

31

32

33

## 34 ABSTRACT

35 Altered glycosylation is an undisputed corollary of cancer development. Understanding these alterations is  
36 paramount but hampered by limitations underlying cellular model systems. For instance, the intricate  
37 interactions between tumour and host cannot be adequately recapitulated in monoculture of tumour-derived cell  
38 lines. More complex co-culture models usually rely on sorting procedures for proteome analyses and rarely  
39 capture the details of protein glycosylation. Here, we report a strategy termed Bio-Orthogonal Cell line-specific  
40 Tagging of Glycoproteins (BOCTAG). Cells are equipped by transfection with an artificial biosynthetic  
41 pathway that transforms bioorthogonally tagged sugars into the corresponding nucleotide-sugars. Only  
42 transfected cells incorporate bioorthogonal tags into glycoproteins in the presence of non-transfected cells. We  
43 employ BOCTAG as an imaging technique and to annotate cell-specific glycosylation sites in mass  
44 spectrometry-glycoproteomics. We demonstrate application in co-culture and mouse models, allowing for  
45 profiling of the glycoproteome as an important modulator of cellular function.

## 46 INTRODUCTION

47 Cancer is a multifactorial disease consisting of an interplay between different host and tumour cells. Emulating  
48 the complexity of a tumour using cell monoculture is thus incomplete by design, requiring more elaborated co-  
49 culture systems or *in vivo* models.<sup>1-3</sup> Recent years have seen a stark increase in methods to probe the  
50 transcriptomes of tumour and host cell populations, respectively, providing some insight into their state within a  
51 multicellular conglomerate.<sup>4</sup> However, the relationship between transcriptome and proteome is still elusive.<sup>5</sup> In  
52 addition, posttranslational modifications (PTMs) heavily impact the plasticity of the proteome. Glycosylation is  
53 the most complex and most abundant PTM, but challenging to probe due to the non-templated nature of glycan  
54 biosynthesis.<sup>6</sup> Glycans are generated by the combinatorial interplay of >250 glycosyltransferases (GTs) and  
55 glycosidases, mostly in the secretory pathway.<sup>7</sup> Certain glycoproteins aberrantly expressed in cancer, such as  
56 mucins, are approved as diagnostic markers, but their discovery is a particular challenge.<sup>8,9</sup> This is especially  
57 true when *in vivo* or *in vitro* model systems comprise cell populations from the same organism that do not allow  
58 distinction of proteomes by amino acid sequence.<sup>10,11</sup> Methods to study the glycoproteome of a cell type in co-  
59 culture or *in vivo* are therefore an unmet need.

60 Metabolic oligosaccharide engineering (MOE) produces chemical reporters of glycan subtypes.<sup>12</sup> MOE reagents  
61 are membrane permeable monosaccharide precursors modified with chemical tags amenable to bioorthogonal  
62 chemistry.<sup>13</sup> Following incorporation into the glycoproteome, chemical tags are reacted with traceable  
63 enrichment handles or fluorophores, for instance by Cu(I)-catalysed azide-alkyne cycloaddition (CuAAC).<sup>14,15</sup>  
64 Many MOE reagents are based on analogues of sugars such as *N*-acetylgalactosamine (GalNAc) that are  
65 straightforward to chemically tag by replacing the acetamide with bioorthogonal *N*-acylamides (Fig. 1a).  
66 Unmodified GalNAc is normally activated by the biosynthetic GalNAc salvage pathway to the nucleotide-sugar  
67 UDP-GalNAc that can follow two major distinct metabolic fates (Fig. 1a).<sup>14,16-18</sup> First, the 20 members of the  
68 GalNAc transferase family (GalNAc-T1...T20) use UDP-GalNAc to form the linkage GalNAc $\alpha$ -Ser/Thr and  
69 thereby prime cancer-relevant O-GalNAc glycans.<sup>14,19,20</sup> Second, epimerisation at the GalNAc C4 position by  
70 the UDP-galactose-4-epimerase (GALE) yields UDP-*N*-acetylglucosamine (UDP-GlcNAc) that can be  
71 incorporated into different glycan subtypes, for instance Asn-linked N-glycans.<sup>17,18,21</sup> Certain chemical

72 modifications at the *N*-acyl moiety can render GalNAc analogues recalcitrant to these metabolic processes. For  
73 instance, analogues of UDP-GalNAc with long alkyne-containing *N*-acyl substituents are not biosynthesised by  
74 the GalNAc salvage pathway and not used as substrates by wild type (WT)-GalNAc-Ts.<sup>18,22–24</sup> While being a  
75 substantial impediment to generating MOE reporters, we realised that overcoming these metabolic roadblocks  
76 might enable programmable bioorthogonal glycoprotein tagging. Such a strategy would allow for studying the  
77 glycoproteome in a cell-specific fashion, which is currently elusive despite the rapid advances in the  
78 development of new MOE reagents.

79 Here, we develop a technique called Bio-Orthogonal Cell-specific Tagging of Glycoproteins (BOCTAG). The  
80 strategy uses an artificial biosynthetic pathway to generate alkyne-tagged UDP-GalNAc and UDP-GlcNAc  
81 analogues from a readily available GalNAc precursor that is not accepted by the GalNAc salvage pathway. We  
82 find that a single methylene group between 5-carbon (GalNAk) and 6-carbon (GalN6yne) *N*-acyl substituents  
83 drastically reduces uptake by the native GalNAc salvage pathway and thereby reduces the background of  
84 bioorthogonal labelling in non-transfected cells. Only cells carrying the artificial pathway biosynthesise the  
85 corresponding UDP-sugars (UDP-GalN6yne and UDP-GlcN6yne) that are then used by GTs to chemically tag  
86 the glycoproteome. We further expand the strategy with mutant GalNAc-Ts that are engineered to accept UDP-  
87 GalN6yne as a substrate. The combined use of an artificial biosynthetic pathway and engineered GalNAc-Ts  
88 enables GalN6yne-mediated fluorescent labelling of the cellular glycoproteome that is two orders of magnitude  
89 higher than in cells carrying neither component. We demonstrate that BOCTAG allows for programmable  
90 glycoprotein tagging in co-culture and mouse models. Moreover, the nature of the artificial biosynthetic  
91 pathway allowed for the use of readily available Ac<sub>4</sub>GalN6yne as a precursor with enhanced stability over  
92 previously used caged GalN6yne-1-phosphates as an essential pre-requisite for *in vivo* applications. We show  
93 that the chemical modification enters a range of glycan subtypes, supporting the use of BOCTAG to tag a large  
94 number of glycoproteins in complex biological systems.

## 95 RESULTS

### 96 **Developing an artificial biosynthetic pathway for chemically tagged UDP-sugars.**

97 The human GalNAc salvage pathway consists of the kinase GALK2 and the pyrophosphorylases AGX1/2 to  
98 convert GalNAc first into GalNAc-1-phosphate and subsequently into UDP-GalNAc, respectively (Fig. 1a).  
99 Since neither analogues of GalNAc nor GalNAc-1-phosphate can be utilized by any other metabolic enzyme,  
100 the GalNAc salvage pathway was deemed suitable for monitoring conversions of each step while supplying  
101 readily accessible synthetic, bioorthogonal precursors. GALK2 and AGX1/2 are impervious to large chemical  
102 modifications at the *N*-acyl moiety of GalNAc (Fig. 1a), corroborated by crystal structures of these enzymes  
103 (Fig. S1).<sup>18,25–27</sup> An artificial biosynthetic pathway was thus designed to convert chemically tagged GalNAc  
104 analogues first to the corresponding sugar-1-phosphates and subsequently to the UDP-sugars. We chose both a  
105 6-carbon hex-5-ynoate chain (GalN6yne) and a 5-carbon pent-4-ynoate chain (GalNAk) as GalNAc  
106 modifications due to their availability and previous use by us and others.<sup>18,27,28</sup> In *in vitro* enzymatic assays  
107 detected by liquid chromatography-mass spectrometry (LC-MS), recombinant GALK2 accepted GalNAk as a  
108 substrate, but only marginally accepted GalN6yne (Fig. 1b). In contrast, promiscuous bacterial *N*-  
109 acetylhexosaminylnyl kinases (NahK) from various source organisms converted GalN6yne to GalN6yne-1-

110 phosphate almost quantitatively (Fig. 1b, fig. S2a).<sup>29</sup> Similarly, the pyrophosphorylase AGX1 showed little to  
111 no turnover of both GalNA1k-1-phosphate and GalN6yne-1-phosphate to the corresponding UDP-sugars (Fig.  
112 1b). We and others have mutated AGX1 at residue Phe383 to smaller amino acids to accommodate chemical *N*-  
113 acyl modifications.<sup>27,30</sup> AGX1<sup>F383A</sup>, herein called mut-AGX1, converted both synthetic GalNA1k-1-phosphate  
114 and GalN6yne-1-phosphate to UDP-GalNA1k and UDP-GalN6yne, respectively (Fig. 1b).

115 We next assessed UDP-sugar biosynthesis in the living cell. Stable bicistronic expression of a codon-optimized  
116 version of *Bifidobacterium longum* NahK as well as mut-AGX1 in K-562 cells biosynthesized UDP-GalNA1k  
117 and UDP-GalN6yne from membrane-permeable per-acetylated precursors Ac<sub>4</sub>GalNA1k and Ac<sub>4</sub>GalN6yne,  
118 respectively (Fig. 1c). Expression of either enzyme alone or WT-AGX1 led to inefficient biosynthesis compared  
119 to levels of native UDP-sugars (Fig. S3). We confirmed these results by feeding cells a caged precursor of  
120 GalN6yne-1-phosphate that was uncaged in the living cell and converted to UDP-GalN6yne only in the  
121 presence of mut-AGX1 (Fig. S3). Alkyne-tagged UDP-GalNAc analogues were converted to the corresponding  
122 UDP-GlcNAc analogues (UDP-GlcNA1k or UDP-GlcN6yne, respectively) in cells by the epimerase GALE,  
123 which was corroborated in an *in vitro* epimerisation assay (Fig. 1a,c fig. S2b, fig. S3). Thus, installing an  
124 artificial biosynthetic pathway led to programmable biosynthesis of alkyne-tagged analogues of UDP-GalNAc  
125 and UDP-GlcNAc.

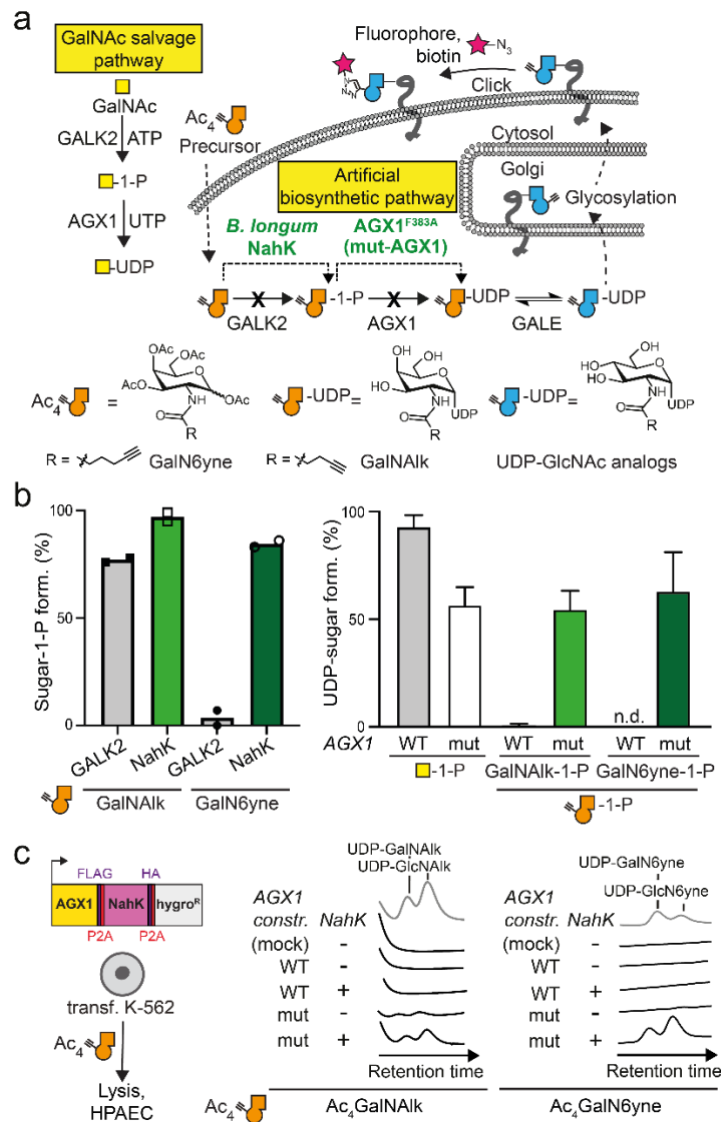

126

127 **Fig. 1: Development of an artificial biosynthetic pathway for chemically tagged UDP-GalNAc/GlcNAc**  
 128 **analogues. a**, strategy of metabolic oligosaccharide engineering. A chemically modified GalNAc analogue that  
 129 is not accepted by the GalNAc salvage pathway should be processed by an artificial biosynthetic pathway. *B.*  
 130 *longum* NahK and mut-AGX1 biosynthesize UDP-GalNAc analogues and, by epimerisation, UDP-GlcNAc  
 131 analogues. Incorporation into glycoconjugates can be traced by CuAAC. **b**, *in vitro* evaluation of GalNAc-1-  
 132 phosphate analogue synthesis by human GALK2 or *B. longum* NahK (left) and UDP-GalNAc analogue  
 133 synthesis by WT- or mut-AGX1 (right). Data were recorded in LC-MS assays and processed by integrated ion  
 134 counts. Data are from two independent experiments and depicted as individual data points and means (left) or  
 135 from three independent experiments and depicted as means + standard deviation (SD, right). **c**, biosynthesis of  
 136 UDP-GalNAc/GlcNAc analogues in cells stably expressing both NahK and mut-AGX1 or either component, as  
 137 assessed by high performance anion exchange chromatography (HPAEC). A hygromycin resistance gene allows  
 138 for stable transfection. Data are representative of one out of two independent experiments collected on two  
 139 different days. mock: pSBbi-GH empty plasmid.

140

141 We next assessed chemical tagging of the cell surface glycoproteome in living cells. K-562 cells stably  
142 expressing combinations of NahK and AGX1 were fed with DMSO, Ac<sub>4</sub>GalNAIk or Ac<sub>4</sub>GalN6yne and reacted  
143 with the clickable fluorophore CF680-picolyl azide by CuAAC. The MOE reagent Ac<sub>4</sub>ManAlk that enters the  
144 pool of the sugar sialic acid was included as a positive control. Alkyne tags were visualized by in-gel  
145 fluorescence after cell lysis (Fig. 2a). While Ac<sub>4</sub>GalNAIk feeding led to high-intensity fluorescent signal when  
146 NahK and mut-AGX1 were expressed, substantial signal was observed in cells expressing WT-AGX1 when  
147 NahK was present (Fig. 2a). Fluorescent signal after Ac<sub>4</sub>GalNAIk feeding was also observed in cells transfected  
148 with an empty plasmid or only overexpressing WT-AGX1, confirming the permissiveness of the GalNAc  
149 salvage pathway for GalNAIk (Fig. 1b).<sup>18</sup> In contrast, Ac<sub>4</sub>GalN6yne incorporation was critically dependent on  
150 the expression of mut-AGX1, while the presence of NahK led to a further sixfold increase in fluorescence  
151 intensity (Fig. 2a). Ac<sub>4</sub>ManAlk gave fluorescent signal regardless of the enzyme combination expressed. Dose  
152 response experiments showed that Ac<sub>4</sub>GalN6yne-mediated fluorescence intensity increased over two orders of  
153 magnitude with the concentration of the probe between 16 nM and 50 μM only when NahK and mut-AGX1  
154 were present (Fig. 2b). Transfection and feeding with chemically modified sugars can in theory alter the cellular  
155 transcriptome, leading to artifacts in protein expression and metabolic labelling. We performed transcriptomic  
156 analyses in cells transfected with either NahK/mut-AGX1 or empty plasmid, and fed with either DMSO vehicle,  
157 Ac<sub>4</sub>GalN6yne or Ac<sub>4</sub>GalNAc. By performing correlation plot and principal component analysis (PCA)(Fig. S4),  
158 we observed that the day of sample collection has a greater effect on transcript levels than either transgene  
159 expression or compound treatment (Fig. S4b). These data suggest that neither artificial biosynthetic pathway nor  
160 compound feeding has substantial effects on the transcriptome. Due to the robustness of metabolic  
161 incorporation, we used Ac<sub>4</sub>GalN6yne as an MOE reagent for all subsequent applications of BOCTAG.

162



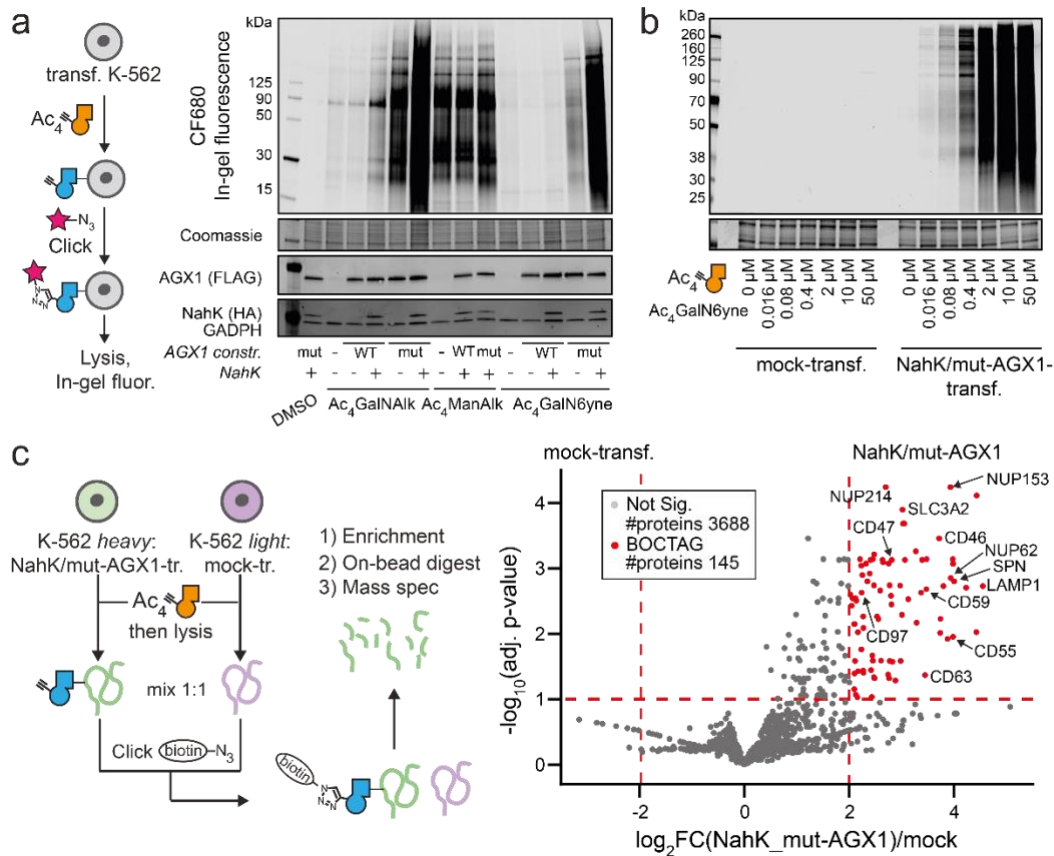

163

164 **Fig. 2: An artificial biosynthetic pathway enables programmable chemical tagging of the glycoproteome.**

165 **a**, evaluation of cell surface glycoproteome tagging after treating K-562 cells stably expressing NahK/AGX1  
 166 combinations with 50 μM Ac<sub>4</sub>GalNAk, 50 μM Ac<sub>4</sub>GalN6yne or 10 μM Ac<sub>4</sub>ManNAk. Glycoproteins were  
 167 visualised by in-gel fluorescence after treating cells with CF680-picolyl azide under CuAAC conditions and  
 168 subsequent cell lysis. **b**, dose-response experiment of cell surface glycoproteome tagging, with samples  
 169 processed as in **a**. Data in **a** and **b** are representative of one out of two independent experiments. **c**, quantitative  
 170 measurement of glycoprotein tagging by SILAC. Data were analysed from three independent experiments,  
 171 collected on three different days, with forward (heavy mock, light NahK/mut-AGX1) and reverse (light mock,  
 172 heavy NahK/mut-AGX1) analyses incorporated as a total of six replicates. Data are visualised as volcano plot,  
 173 choosing 4-fold enrichment and a p-value of 0.1 as cut-offs, with example glycoproteins annotated. Significance  
 174 levels were indicated. mock: pSBbi-GH empty plasmid.

175

176 **An artificial biosynthetic pathway allows for programmable enrichment of the glycoproteome.**

177 We used Stable Isotope Labelling by Amino Acids in Cell Culture (SILAC)-based proteome analysis to confirm  
 178 and quantify chemical glycoproteome tagging. K-562 cells transfected with NahK/mut-AGX1 or an empty  
 179 plasmid (mock-transfected). Both were individually grown in heavy or light media in the presence of either  
 180 Ac<sub>4</sub>GalN6yne or DMSO. Lysates of these cells were mixed as different combinations to contain equal amounts  
 181 of heavy and light protein, and clickable biotin-picolyl azide was installed on tagged glycoproteins by CuAAC.  
 182 Enrichment on neutravidin beads followed by on-bead digest allowed analysis by quantitative mass

183 spectrometry (MS). In three independent experiments in which both combinations of heavy and light SILAC  
184 labelling each were used (Fig. 2c), we found peptides from 145 proteins to be significantly enriched in  
185 NahK/mut-AGX1-transfected cells (Supplementary Table1). More than 99% (143/145) of these proteins have  
186 been previously annotated<sup>31-33</sup> as either N- or O-glycosylated, including the nucleoporins Nup62 and Nup153  
187 and the cell surface proteins CD47 and NOTCH1, confirming the stringency of the approach for tagging  
188 glycoproteins.

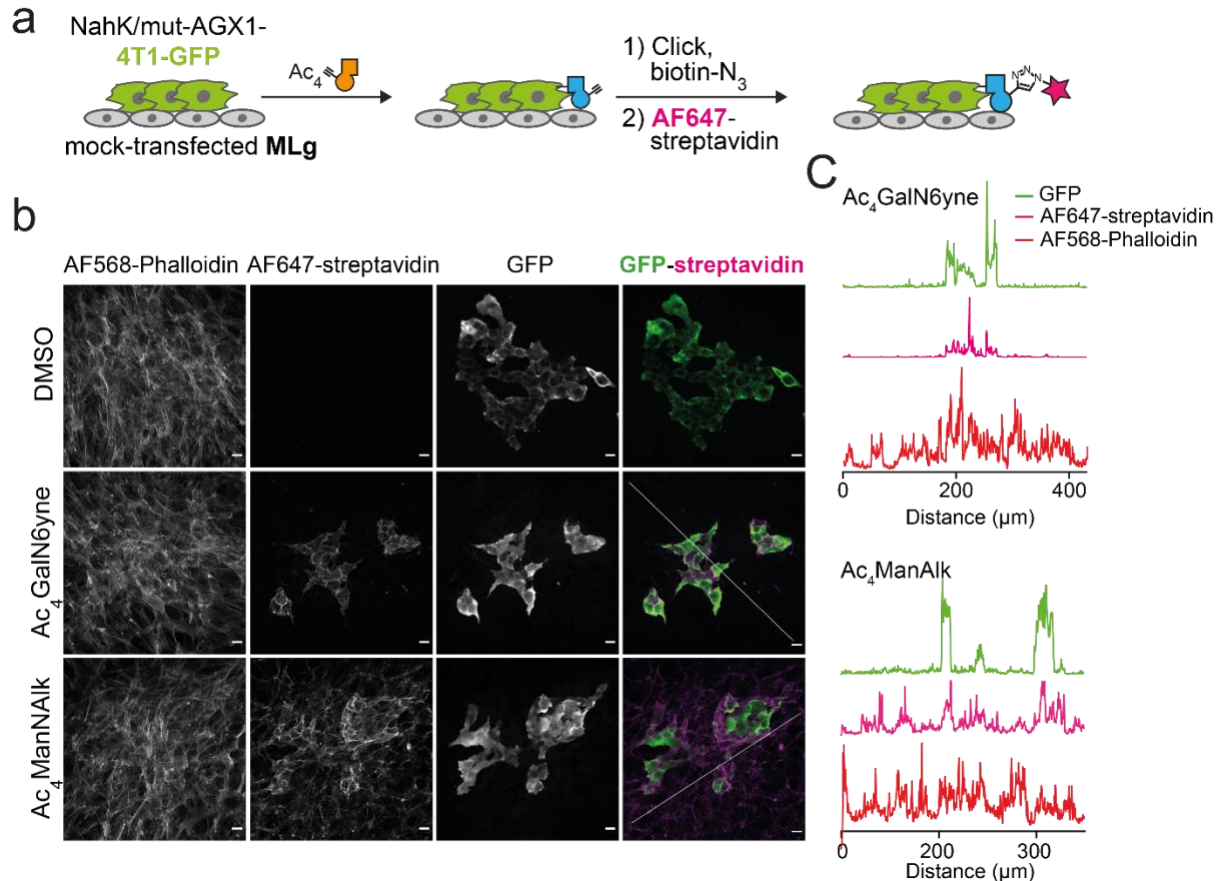

189  
190 **Fig. 3: Bioorthogonal cell-specific glycoprotein tagging in co-culture.** **a**, schematic of the 4T1-MLg co-  
191 culture experiment. Green fluorescent protein (GFP)-expressing 4T1 cells transfected with NahK/mut-AGX1  
192 should be selectively positive for AF647-labelling in BOCTAG. **b**, fluorescence microscopy, using co-cultures  
193 fed with 50 μM Ac<sub>4</sub>GalN6yne or 50 μM Ac<sub>4</sub>ManNAIk as well as Alexafluor568-phalloidin as a counterstain. **c**,  
194 intensity profile of fluorescent signal between GFP and AF647 in Ac<sub>4</sub>GalN6yne- (top) or Ac<sub>4</sub>ManNAIk-fed  
195 (bottom) co-cultures. Scale bar, 20 μm. The intensity profile of GFP, AF647-Streptavidin and AF568-Phalloidin  
196 signals was measured along a diagonal line drawn along the fluorescent image. Data are representative of one  
197 out of two independent experiments.

198

### 199 Cell type-specific glycoproteome tagging in co-culture.

200 We next assessed the suitability of the artificial biosynthetic pathway NahK/mut-AGX1 as a BOCTAG cell  
201 type-specific glycoproteome labelling technique by fluorescence microscopy. Colonies of NahK/mut-AGX1-



202 transfected and GFP-expressing 4T1 breast cancer cells were established on a monolayer of non-transfected  
203 MLg fibroblast cells by co-culturing for 72 h before media supplementation with either Ac<sub>4</sub>GalN<sub>6</sub>yne,  
204 Ac<sub>4</sub>ManAlk or DMSO (Fig. 3a). Clickable biotin-picolyl azide was installed by CuAAC followed by  
205 Streptavidin-AF647 staining to visualize chemical tagging, and cells were counter-stained with fluorescently  
206 labelled phalloidin. Streptavidin-AF647 signal was strongly and reproducibly restricted to GFP-expressing cells  
207 only when Ac<sub>4</sub>GalN<sub>6</sub>yne was fed and NahK/mut-AGX1 were expressed (Fig. 3b, C, fig. S5-S8), indicating a  
208 localised BOCTAG signal. In contrast, the promiscuous MOE reagent Ac<sub>4</sub>ManNAlk was non-specifically  
209 incorporated throughout the entire co-culture (Fig. 3b, c, fig. S5-S8). When both GFP-4T1 and MLg cell lines  
210 expressed NahK/mut-AGX1, both exhibited a strong Streptavidin-AF647 signal (Fig. S8b). Taken together,  
211 BOCTAG enables cell-specific tagging of cell surface glycoproteins in co-culture.

212

### 213 **Assessing and manipulating the glycan types tagged by GalN<sub>6</sub>yne.**

214 We next sought to assess and expand the glycan subtypes targeted by our MOE approach. We were prompted by  
215 our recent findings that GalNAc analogues with bulky *N*-acyl chains such as GalN<sub>6</sub>yne are not incorporated into  
216 O-GalNAc glycans by WT-GalNAc-Ts (Fig. 4a).<sup>23,27,34</sup> We have created GalNAc-T mutants termed BH-  
217 GalNAc-Ts (for “bump-and-hole engineering”, the process used to design the mutants) that selectively use such  
218 chemically tagged UDP-GalNAc analogues in glycosylation reactions.<sup>23,27,34</sup> We stably co-expressed WT- or  
219 BH-versions of GalNAc-T1 or T2 from plasmids also encoding NahK and mut-AGX1 in K-562 cells (Fig. 4a).  
220 Expression of BH-GalNAc-Ts increased the intensity of in-gel fluorescence more than sevenfold over  
221 expression of WT-GalNAc-Ts when cells were fed with Ac<sub>4</sub>GalN<sub>6</sub>yne (Fig. 4b). WT-AGX1 expressing cells  
222 lacked UDP-GalN<sub>6</sub>yne/UDP-GlcN<sub>6</sub>yne biosynthesis and did not show any discernible fluorescent signal over  
223 vehicle control DMSO (Fig. 1c). We assessed the subtypes of the chemically tagged glycans by digestion with  
224 the hydrolytic enzymes PNGase F (reduces N-glycosylation), StcE (digests mucin-type glycoproteins) and  
225 OpeRATOR (digests O-GalNAc glycoproteins in the presence of the sialidase SialEXO) prior to in-gel  
226 fluorescence.<sup>35</sup> In cells expressing NahK, mut-AGX1 and WT-GalNAc-Ts, fluorescent labelling was slightly  
227 sensitive to PNGase F treatment, indicating that the major target structures are N-glycoproteins in these cells  
228 (Fig. 4c). Co-expression of BH-GalNAc-Ts led to additional highly intense fluorescent signal of a small number  
229 of O-glycoproteins with sensitivity to both StcE and OpeRATOR/SialEXO (Fig. 4c). Thus, BH-GalNAc-Ts  
230 broaden the target scope of chemical tagging to include O-GalNAc glycoproteins with high incorporation  
231 efficiency. Concomitant with this finding, we performed quantitative MS-proteome analysis by SILAC of cell  
232 lines expressing NahK/mut-AGX1/BH-GalNAc-T2 (BH-T2). In contrast to cells expressing only NahK/mut-  
233 AGX1/WT-T2 (Fig. 2c), we observed an increase from 37% to 61% of O-GalNAc glycoproteins<sup>31-33</sup> in the  
234 enriched protein fraction (Supplementary Table1).

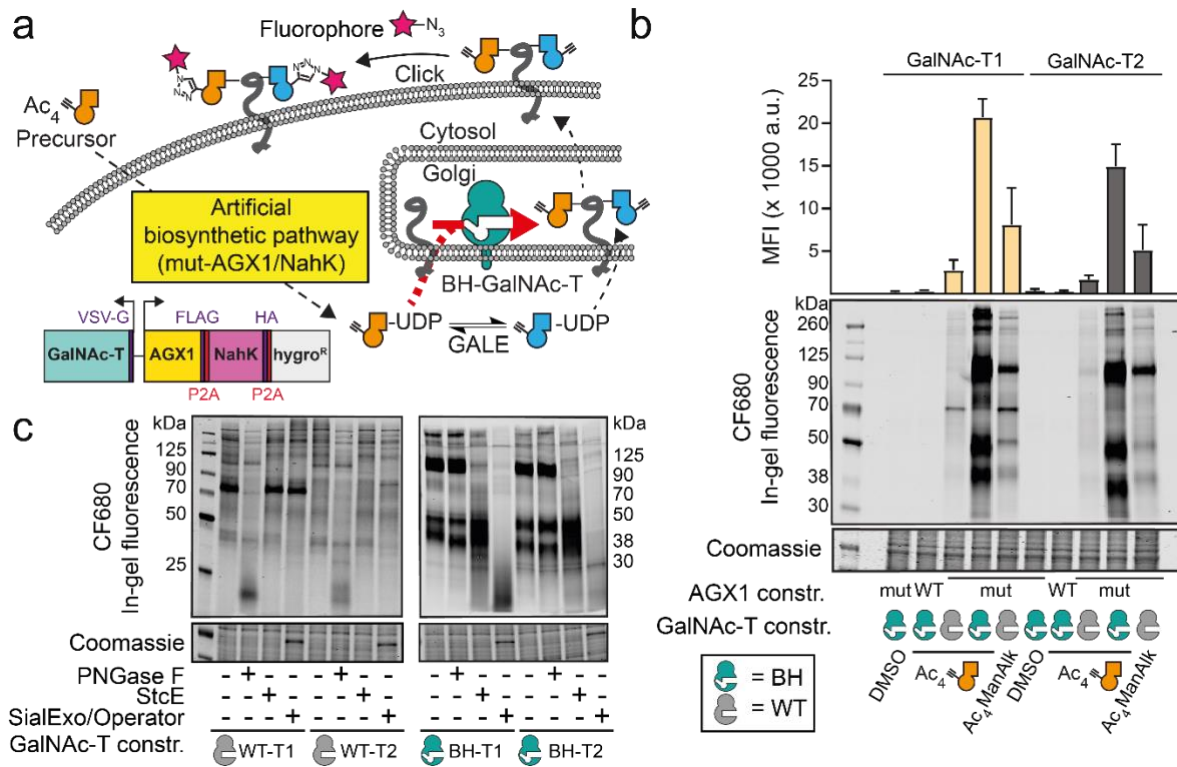

235

236 **Fig. 4: Enhancement of programmable glycoprotein tagging by expression of BH-GalNAc-Ts.** **a**, strategy  
 237 of expanding glycoprotein tagging to include O-GalNAc glycans. Expression of BH-GalNAc-Ts selectively  
 238 engineered to accommodate bulky chemical tags enhances O-GalNAc tagging in cells expressing NahK/  
 239 mut-AGX1. **b**, evaluation of tagging efficiency by feeding transfected K-562 cells DMSO, 1  $\mu$ M Ac<sub>4</sub>GalN $\delta$ yne or 2  
 240  $\mu$ M Ac<sub>4</sub>ManNAIk. Tagging was analysed by in-gel fluorescence and quantification by densitometry as means +  
 241 SD from three independent experiments. **c**, assessment of tagged glycan subtypes by treating the samples of  
 242 cells fed with Ac<sub>4</sub>GalN $\delta$ yne analysed in **b** with hydrolytic enzymes. Data are representative of one out of a total  
 243 of four replicate labelling experiments performed on two different days.

244

#### 245 MS-based validation of cell-type specific labelling in co-culture models.

246 We then validated BOCTAG as a strategy for cell-specific MS-glycoproteome analysis. We chose a co-culture  
 247 model between murine 4T1 and human MCF7 breast cancer cell lines, opting to distinguish labelled  
 248 glycoproteins with species-specific peptide sequences by label-free quantitative (LFQ) LC/MS-MS analysis. We  
 249 transfected cells with either NahK/mut-AGX1/BH-GalNAc-T2 (termed “BOCTAG-T2”) or empty plasmid  
 250 (pSBbi-Hyg, mock), co-cultured murine and human cells overnight and subsequently fed the co-cultures with  
 251 either Ac<sub>4</sub>GalN $\delta$ yne or vehicle DMSO. Chemically tagged glycoproteins in the secretome were reacted with  
 252 acid-cleavable biotin-picolyl azide by CuAAC and enriched on neutravidin magnetic beads (Fig. 5a). On-bead  
 253 digest yielded a peptide fraction and left glycopeptides bound to beads to be separately eluted with formic  
 254 acid<sup>24,36,37</sup>. Peptide samples were assessed by LFQ MS-proteomics in two independent experiments, choosing a  
 255 8-fold enrichment and a p-value of 0.1 as cut-offs. We observed species-specific protein enrichment: BOCTAG-  
 256 T2-expressing 4T1 cells led to 132 selectively enriched murine peptides while BOCTAG-T2-expressing MCF7  
 257 cells allowed detection of 24 selectively enriched human peptides when co-cultured with mock-transfected cells

258 of the respective other species (Fig. 5b, Supplementary Table2). Only two human peptides and one murine  
259 peptide were found in the enriched datasets from the corresponding other species.  
260 BOCTAG-T2 allows for cell-specific glycosylation site identification. Using a tandem MS technique consisting  
261 of higher energy collision dissociation (HCD)-triggered electron transfer dissociation (ETD), we identified 37  
262 specific glycosylation sites on 57 murine glycopeptides from 4T1 cells and 9 specific glycosylation sites on 12  
263 human glycopeptides from MCF7 cells in secretome samples (Supplementary Table2). Our data indicated  
264 glycosylation of homologous glycopeptides from murine and human origins in pro-X carboxypeptidase in  
265 secretome (Fig. 5d, fig. S9c). We also performed an MS-glycoproteomics experiment in lysate from the  
266 4T1/MCF7 co-culture expressing BOCTAG-T2 or empty plasmid. We annotated a total of 4 specific  
267 glycosylation sites on 11 murine glycopeptides from 4T1 samples and 2 specific glycosylation sites on 8 human  
268 glycopeptides from MCF7 cells (Supplementary Table 3). Particularly, we identified a homologous  
269 glycopeptide from both human and murine glucosidase 2 (Fig. S9b). The presence of the chemical tag facilitated  
270 manual annotation of mass spectra in all cases due to the specific mass shift associated with the chemical  
271 modification, in line with our own previous results.<sup>38</sup>

272

### 273 **Bioorthogonal cell-specific tagging of glycoproteins in vivo.**

274 We next investigated the applicability of our BOCTAG strategy in an *in vivo* tumour model. Tumours were grown  
275 in the fat pads of NOD-SCID IL2R<sup>gnull</sup> (NSG) mice, consisting of 4T1 cells expressing GFP and either  
276 BOCTAG-T2 (one fat pad) or no additional transgene (empty plasmid, another fat pad). These mice were  
277 intraperitoneally injected with Ac<sub>4</sub>GalN<sub>6</sub>yne, vehicle or Ac<sub>4</sub>ManNAIk once daily for five consecutive days (Fig.  
278 5e). At the end of the treatment, the tumours were harvested, homogenized, treated with biotin-picolyl azide under  
279 CuAAC conditions and the labelling analysed by streptavidin blot. A strong fluorescent signal was observed in  
280 the BOCTAG-T2 tumours treated with Ac<sub>4</sub>GalN<sub>6</sub>yne (Fig 5e). In contrast, tumours transfected with empty  
281 plasmid showed minimal labelling signal with either vehicle or Ac<sub>4</sub>GalN<sub>6</sub>yne treatment. All samples treated with  
282 Ac<sub>4</sub>ManNAIk irrespective of the presence of NahK/mut-AGX1/BH-T2 displayed strong fluorescent signal. These  
283 data demonstrated that glycoproteins are selectively tagged when NahK/mut-AGX1/BH-T2 are expressed in the  
284 tumour. We also performed intratumoral injections of either Ac<sub>4</sub>GalN<sub>6</sub>yne or DMSO and observed the same  
285 BOCTAG-T2-dependent labelling (Fig. S10a).

286 To evaluate the protein expression levels of NahK/mut-AGX1/BH-T2 *ex vivo*, part of the tumours were digested,  
287 plated and cells cultured. Protein expression of NahK/mut-AGX1/BH-T2 was assessed by Western blot and found  
288 to be comparable to expression levels before *in vivo* injection (Fig. S10b). Cells also generally retained the ability  
289 to incorporate Ac<sub>4</sub>GalN<sub>6</sub>yne-dependent chemical glycoproteome tagging (Fig. S10b).

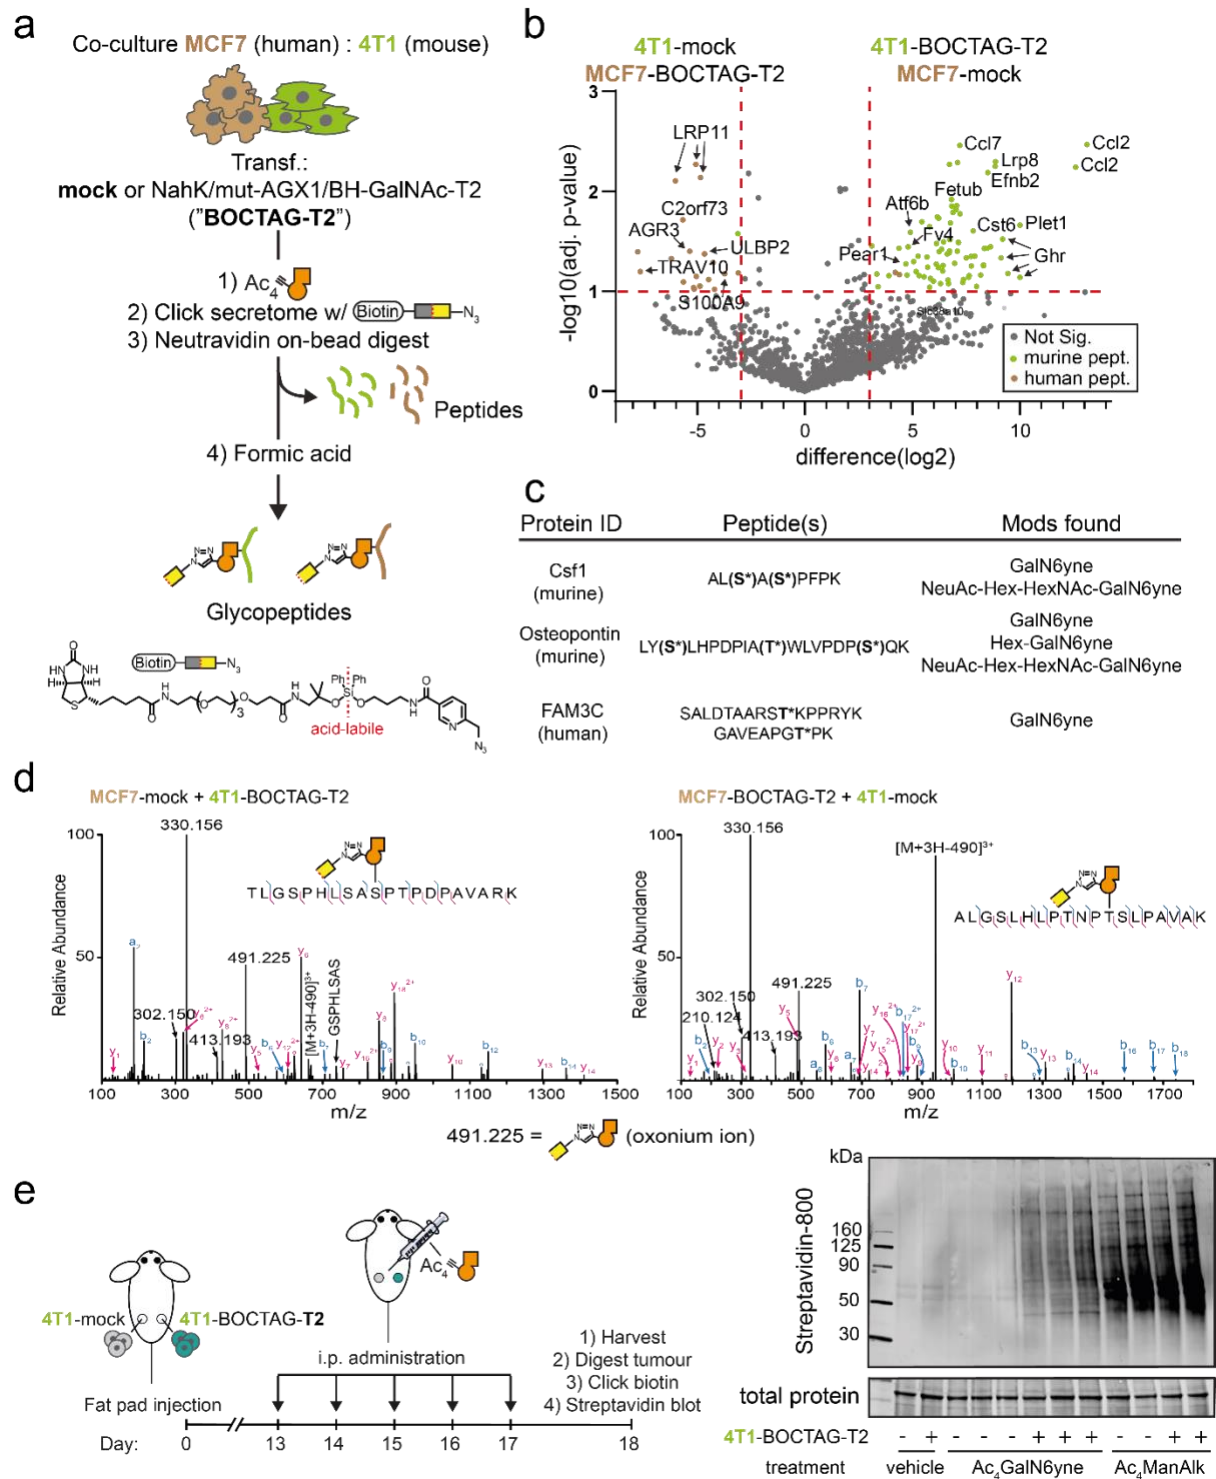

290

291 **Fig. 5: BOCTAG labels glycoproteins in a cell-specific manner in co-culture and *in vivo*.** **a**, cell-selective  
 292 enrichment and MS-glycoproteome analysis of murine-human co-culture systems. MCF7 and 4T1 cells  
 293 transfected as indicated were co-cultured overnight and treated with DMSO or 10 μM Ac<sub>4</sub>GalN6yne for 24h.  
 294 Secretome was subjected to CuAAC with acid-cleavable biotin-picolyl azide and enriched on neutravidin beads.  
 295 On-bead digest yielded peptide fractions while acid treatment of beads yielded glycopeptide fractions. **b**, MS  
 296 analysis of peptide fractions from **a** by choosing 8-fold enrichment and a p-value of 0.1 as cut-offs. Species-  
 297 specific peptides are indicated. Data are from two independent experiments. **c**, examples of enriched

298 glycopeptides and glycoforms. Asterisk annotates glycosylation sites; parentheses indicate potential  
299 glycosylation sites that could not be confidently assigned. **d**, HCD spectra of homologous glycopeptides from  
300 murine (left) and human (right) origins. Peptide sequences were confirmed by ETD (Fig S9c). **e**, *in vivo*  
301 glycoproteome tagging by BOCTAG-T2. Tumours were grown in fat pads of mice as described. BOCTAG-T2  
302 and mock tumours were grown in the same mouse treated systemically by intraperitoneal (i.p. administration)  
303 for five days with 300 mg/kg Ac<sub>4</sub>GalN6yne, Ac<sub>4</sub>ManNAc or the corresponding volume of vehicle. Tumours  
304 were harvested, lysed, subjected to CuAAC with biotin-picolyl azide and analysed by streptavidin blot. Hex =  
305 Hexose, e.g. galactose; NeuAc = *N*-acetylneuraminic acid; HexNAc = *N*-acetylhexosamine, e.g. GlcNAc. mock:  
306 pSBbi-Hyg.

307

## 308 DISCUSSION

309 We developed BOCTAG to address two major shortcomings in prominent research fields such as  
310 cancer biology. First, there is still an unmet need for characterising proteins produced by a particular  
311 cell type. Glycans are a means to an end in this respect, and the large signal-to-noise ratio in our  
312 fluorescent labelling experiments indicates that BOCTAG allows for efficient protein tagging. The  
313 approach is complementary to other techniques, including the use of unnatural amino acids and  
314 proximity biotinylation.<sup>39,40</sup> Second, directly incorporating glycans in the analysis will give insight  
315 into cell-type-specific glycosylation sites and glycan structures to add another dimension to proteome  
316 profiling. The presence of a modification that can be observed by MS and is a direct corollary of  
317 using chemical tools allows for further validation of enriched glycoproteins, facilitating  
318 glycoproteome analysis even in complex co-culture or *in vivo* settings. An artificial biosynthetic  
319 pathway was essential to ensure minimal background labelling while being able to supply the tagged  
320 sugar as an easy-to-synthesise MOE reagent. To this end, the use of the kinase NahK allows for use of  
321 a per-acetylated bioorthogonal sugar that is fundamental to *in vivo* use and in marked difference to  
322 highly unstable caged sugar-1-phosphates used previously.<sup>19,27</sup> To enable BOCTAG, cells require  
323 transfection with at least two transgenes. However, the design of a multicistronic, transposase-  
324 responsive plasmid ensures that transfection efforts are straightforward.<sup>41,42</sup> BOCTAG allowed us to  
325 selectively tag tumour glycoproteomes *in vivo*, highlighting the robustness of the approach. MOE  
326 reagents have been chemically caged to be released by enzymes overexpressed in cancer<sup>43-45</sup>. While  
327 independent of transfection, such targeting can be accompanied by substantial background labelling in  
328 non-cancerous tissue. BOCTAG allows for programmable glycoprotein tagging with remarkable  
329 signal-to-noise ratio, and an enabling technology that will transform our understanding of tumour-host  
330 interactions particularly in the context of protein glycosylation.

331

332



333 **Data availability**

334 Mass spectrometry raw sequencing data will be made available in a public repository.

335

336 **ACKNOWLEDGEMENTS**

337 We thank Mahmoud-Reza Rafiee for help with data analysis, Acely Garza-Garcia, Holly Douglas and

338 Christelle Soudy for help with chromatography, and Kayvon Pedram for providing StcE. We thank

339 Junwon Choi for UDP-sugar standards for chromatography. We thank Phil Walker for advice on

340 vector choice, and Rocco D'Antuono of the Crick Advanced Light Microscopy STP for support and

341 assistance in this work. We thank Phil East of the Bioinformatics and Biostatistics Science

342 Technology Platform for help with data analysis. We are grateful for support by the Francis Crick

343 Institute Cell Services and Peptide Chemistry Science Technology Platforms. This work was

344 supported by the Francis Crick Institute (A. C., B. C., T. R., V. B., A. M., G. B.-T., H. F., Z. L., O. Y.

345 T., C. R., P. S.-B., S. K., I. M., B. S.) which receives its core funding from Cancer Research UK

346 (FC001749, FC001045), the UK Medical Research Council (FC001749, FC001045) and Wellcome

347 Trust (FC001749, FC001045). This work was supported by the ERC (788231 to S. L. F.), the

348 Wellcome Trust (218304/Z/19/Z to A. M. and B. S.), the EPSRC (EP/S013741/1 to T. K. and M. A.

349 F., and EP/S005226/1 to S. L. F.), the BBSRC (BB/T01279X/1 to Z. L. and B. S., BB/M027791/1

350 and BB/M028836/1 to S. L. F., and BB/M02847X/1 to T. K. and M. A. F.) and the NIH (R01

351 CA200423 to C.R.B.). B.C. was supported by a Crick-HEI studentship funded by the Department of

352 Chemistry at Imperial College London and the Francis Crick Institute. For the purpose of Open

353 Access, the author has applied a CC BY public copyright licence to any Author Accepted Manuscript

354 version arising from this submission.

355 **REFERENCES**

356 1. Ombrato, L. *et al.* Metastatic-niche labelling reveals parenchymal cells with stem features.

357 *Nature* **572**, 603–608 (2019).

358 2. del Pozo Martin, Y. *et al.* Mesenchymal Cancer Cell-Stroma Crosstalk Promotes Niche

359 Activation, Epithelial Reversion, and Metastatic Colonization. *Cell Rep.* **13**, 2456–2469



- 360 (2015).
- 361 3. Yamaguchi, H. & Sakai, R. Direct interaction between carcinoma cells and cancer associated  
362 fibroblasts for the regulation of cancer invasion. *Cancers (Basel)*. **7**, 2054–2062 (2015).
- 363 4. Nayak, R. & Hasija, Y. A hitchhiker’s guide to single-cell transcriptomics and data analysis  
364 pipelines. *Genomics* **113**, 606–619 (2021).
- 365 5. Schoof, E. M. *et al.* Quantitative single-cell proteomics as a tool to characterize cellular  
366 hierarchies. *Nat. Commun.* **12**, (2021).
- 367 6. Varki, A. & Gagneux, P. Biological Functions of Glycans. in *Essentials of Glycobiology, 3rd*  
368 *edition* (2017).
- 369 7. Clausen, H., Schjoldager, K. T., Narimatsu, Y. & Joshi, H. J. Global view of human protein  
370 glycosylation pathways and functions. doi:10.1038/s41580-020-00294-x.
- 371 8. Kailemia, M. J., Park, D. & Lebrilla, C. B. Glycans and glycoproteins as specific biomarkers  
372 for cancer. *Anal. Bioanal. Chem.* **409**, 395–410 (2017).
- 373 9. Scott, E. & Munkley, J. Glycans as biomarkers in prostate cancer. *Int. J. Mol. Sci.* **20**, (2019).
- 374 10. Krasny, L. & Huang, P. H. Data-independent acquisition mass spectrometry (DIA-MS) for  
375 proteomic applications in oncology. doi:10.1039/d0mo00072h.
- 376 11. Gauthier, N. P. *et al.* Cell-selective labeling using amino acid precursors for proteomic studies  
377 of multicellular environments. *Nat. Methods* **10**, 768–773 (2013).
- 378 12. Sletten, E. M. & Bertozzi, C. R. Bioorthogonal chemistry: Fishing for selectivity in a sea of  
379 functionality. *Angew. Chemie - Int. Ed.* **48**, 6974–6998 (2009).
- 380 13. Parker, C. G. & Pratt, M. R. Click Chemistry in Proteomic Investigations. *Cell* vol. 180 605–  
381 632 (2020).
- 382 14. Hang, H. C., Yu, C., Kato, D. L. & Bertozzi, C. R. A metabolic labeling approach toward  
383 proteomic analysis of mucin-type O-linked glycosylation. *Proc. Natl. Acad. Sci. U. S. A.* **100**,  
384 14846–14851 (2003).
- 385 15. Besanceney-Webler, C. *et al.* Increasing the efficacy of bioorthogonal click reactions for  
386 bioconjugation: A comparative study. *Angew. Chemie - Int. Ed.* **50**, 8051–8056 (2011).
- 387 16. Zaro, B. W., Yang, Y., Hang, H. C. & Pratt, M. R. Chemical reporters for fluorescent detection  
388 and identification of O-GlcNAc-modified proteins reveal glycosylation of the ubiquitin ligase  
389 NEDD4-1. **108**, 1–6 (2011).

- 390 17. Boyce, M. *et al.* Metabolic cross-talk allows labeling of O-linked  $\beta$ -N- acetylglucosamine-  
391 modified proteins via the N-acetylgalactosamine salvage pathway. *Proc. Natl. Acad. Sci. U. S.*  
392 *A.* **108**, 3141–3146 (2011).
- 393 18. Cioce, A. *et al.* Optimization of Metabolic Oligosaccharide Engineering with Ac4GalNAk  
394 and Ac4GlcNAk by an Engineered Pyrophosphorylase. *ACS Chem. Biol.* (2021)  
395 doi:10.1021/acscchembio.1c00034.
- 396 19. Debets, M. F. *et al.* Metabolic precision labeling enables selective probing of O-linked N -  
397 acetylgalactosamine glycosylation . *Proc. Natl. Acad. Sci.* **117**, 25293–25301 (2020).
- 398 20. Pratt, M. R. *et al.* Deconvoluting the functions of polypeptide N- $\alpha$ -  
399 acetylgalactosaminyltransferase family members by glycopeptide substrate profiling. *Chem.*  
400 *Biol.* **11**, 1009–1016 (2004).
- 401 21. Broussard, A. *et al.* Human UDP-galactose 4'-epimerase (GALE) is required for cell-surface  
402 glycome structure and function. *J. Biol. Chem.* **295**, 1225–1239 (2020).
- 403 22. Stanley, P. Pharmaceutical Chinese hamster ovary mutants for glycosylation engineering of  
404 biopharmaceuticals. **2**, 359–361 (2014).
- 405 23. Choi, J. *et al.* Engineering Orthogonal Polypeptide GalNAc-Transferase and UDP-Sugar Pairs.  
406 *J. Am. Chem. Soc.* **141**, 13442–13453 (2019).
- 407 24. Schumann, B. *et al.* Bump-and-Hole Engineering Identifies Specific Substrates of  
408 Glycosyltransferases in Living Cells. *Mol. Cell* **78**, 824-834.e15 (2020).
- 409 25. Pouilly, S., Bourgeaux, V., Piller, F. & Piller, V. Evaluation of analogues of GalNAc as  
410 substrates for enzymes of the Mammalian GalNAc salvage pathway. *ACS Chem. Biol.* **7**, 753–  
411 760 (2012).
- 412 26. Bourgeaux, V., Piller, F. & Piller, V. Two-step enzymatic synthesis of UDP-N-  
413 acetylgalactosamine. *Bioorganic Med. Chem. Lett.* **15**, 5459–5462 (2005).
- 414 27. Schumann, B. *et al.* Bump-and-Hole Engineering Identifies Specific Substrates of  
415 Glycosyltransferases in Living Cells. *Mol. Cell* **78**, 824-834.e15 (2020).
- 416 28. Lewis, Y. E. *et al.* O-GlcNAcylation of  $\alpha$ -Synuclein at Serine 87 Reduces Aggregation  
417 without Affecting Membrane Binding. *ACS Chem. Biol.* **12**, 1020–1027 (2017).
- 418 29. Keenan, T. *et al.* Profiling Substrate Promiscuity of Wild-Type Sugar Kinases for Multi-  
419 fluorinated Monosaccharides. *Cell Chem. Biol.* **27**, 1199-1206.e5 (2020).
- 420 30. Yu, S. *et al.* Metabolic labeling enables selective photocrosslinking of O-GlcNAc-modified

- 421 proteins to their binding partners. **109**, 1–6 (2012).
- 422 31. York, W. S. *et al.* GlyGen: Computational and Informatics Resources for Glycoscience.  
423 *Glycobiology* **30**, 72–73 (2020).
- 424 32. Steentoft, C. *et al.* Precision mapping of the human O-GalNAc glycoproteome through  
425 SimpleCell technology. *EMBO J.* **32**, 1478–1488 (2013).
- 426 33. Joshi, H. J. *et al.* GlycoDomainViewer: a bioinformatics tool for contextual exploration of  
427 glycoproteomes. *Glycobiology* **28**, 131–136 (2018).
- 428 34. Cioce, A., Malaker, S. A. & Schumann, B. Generating orthogonal glycosyltransferase and  
429 nucleotide sugar pairs as next-generation glycobiology tools. *Curr. Opin. Chem. Biol.* **60**, 66–  
430 78 (2021).
- 431 35. Malaker, S. A. *et al.* The mucin-selective protease StcE enables molecular and functional  
432 analysis of human cancer-associated mucins. *Proc. Natl. Acad. Sci. U. S. A.* **116**, 7278–7287  
433 (2019).
- 434 36. Woo, C. M., Iavarone, A. T., Spiciarich, D. R., Palaniappan, K. K. & Bertozzi, C. R. Isotope-  
435 targeted glycoproteomics ( IsoTaG ): a mass-independent platform for intact N- and O-  
436 glycopeptide discovery and analysis. **12**, 561–567 (2015).
- 437 37. Miyamoto, D. K., Flaxman, H. A., Wu, H. Y., Gao, J. & Woo, C. M. Discovery of a Celecoxib  
438 Binding Site on Prostaglandin e Synthase (PTGES) with a Cleavable Chelation-Assisted  
439 Biotin Probe. *ACS Chem. Biol.* **14**, 2527–2532 (2019).
- 440 38. Calle, B. *et al.* Benefits of Chemical Sugar Modifications Introduced by Click Chemistry for  
441 Glycoproteomic Analyses. *J. Am. Soc. Mass Spectrom.* **32**, 2366–2375 (2021).
- 442 39. Wei, W. *et al.* Cell type-selective secretome profiling in vivo. *Nat. Chem. Biol.*  
443 doi:10.1038/s41589-020-00698-y.
- 444 40. Alvarez-Castelao, B. *et al.* Cell-type-specific metabolic labeling of nascent proteomes in vivo.  
445 *Nat. Biotechnol.* **35**, 1196–1201 (2017).
- 446 41. Mátés, L. *et al.* Molecular evolution of a novel hyperactive Sleeping Beauty transposase  
447 enables robust stable gene transfer in vertebrates. *Nat. Genet.* **41**, 753–761 (2009).
- 448 42. Kowarz, E., Löscher, D. & Marschalek, R. Optimized Sleeping Beauty transposons rapidly  
449 generate stable transgenic cell lines. *Biotechnol. J.* **10**, 647–653 (2015).
- 450 43. Shim, M. K. *et al.* Cathepsin B-Specific Metabolic Precursor for In Vivo Tumor-Specific  
451 Fluorescence Imaging. *Angew. Chemie - Int. Ed.* **55**, 14698–14703 (2016).

- 452 44. Shim, M. K. *et al.* Caspase-3/-7-Specific Metabolic Precursor for Bioorthogonal Tracking of  
453 Tumor Apoptosis. *Sci. Rep.* **7**, 1–15 (2017).
- 454 45. Wang, H. *et al.* Selective in vivo metabolic cell-labeling-mediated cancer targeting. *Nat.*  
455 *Chem. Biol.* **13**, 415–424 (2017).
- 456
